# Supplementary material for: Space–time clustering of childhood cancers: a systematic review and pooled analysis
Source: Springer Nature journal article supplement (doi:10.1007/s10654-018-0456-y), 2018-11-16
Supplement: MOESM2 [file 16275942]

**Figure S1** Pooled analysis of space-time clustering studies of childhood leukaemia for place and time of diagnosis for children aged 0-15 years (top), 0-5 years (middle) and 5-15 years (bottom): Forrest plot of ratio of observed over expected number of close pairs of cases (O/E) and acceptance region for one-sided Knox test assuming Poisson distribution at 5% alpha-level

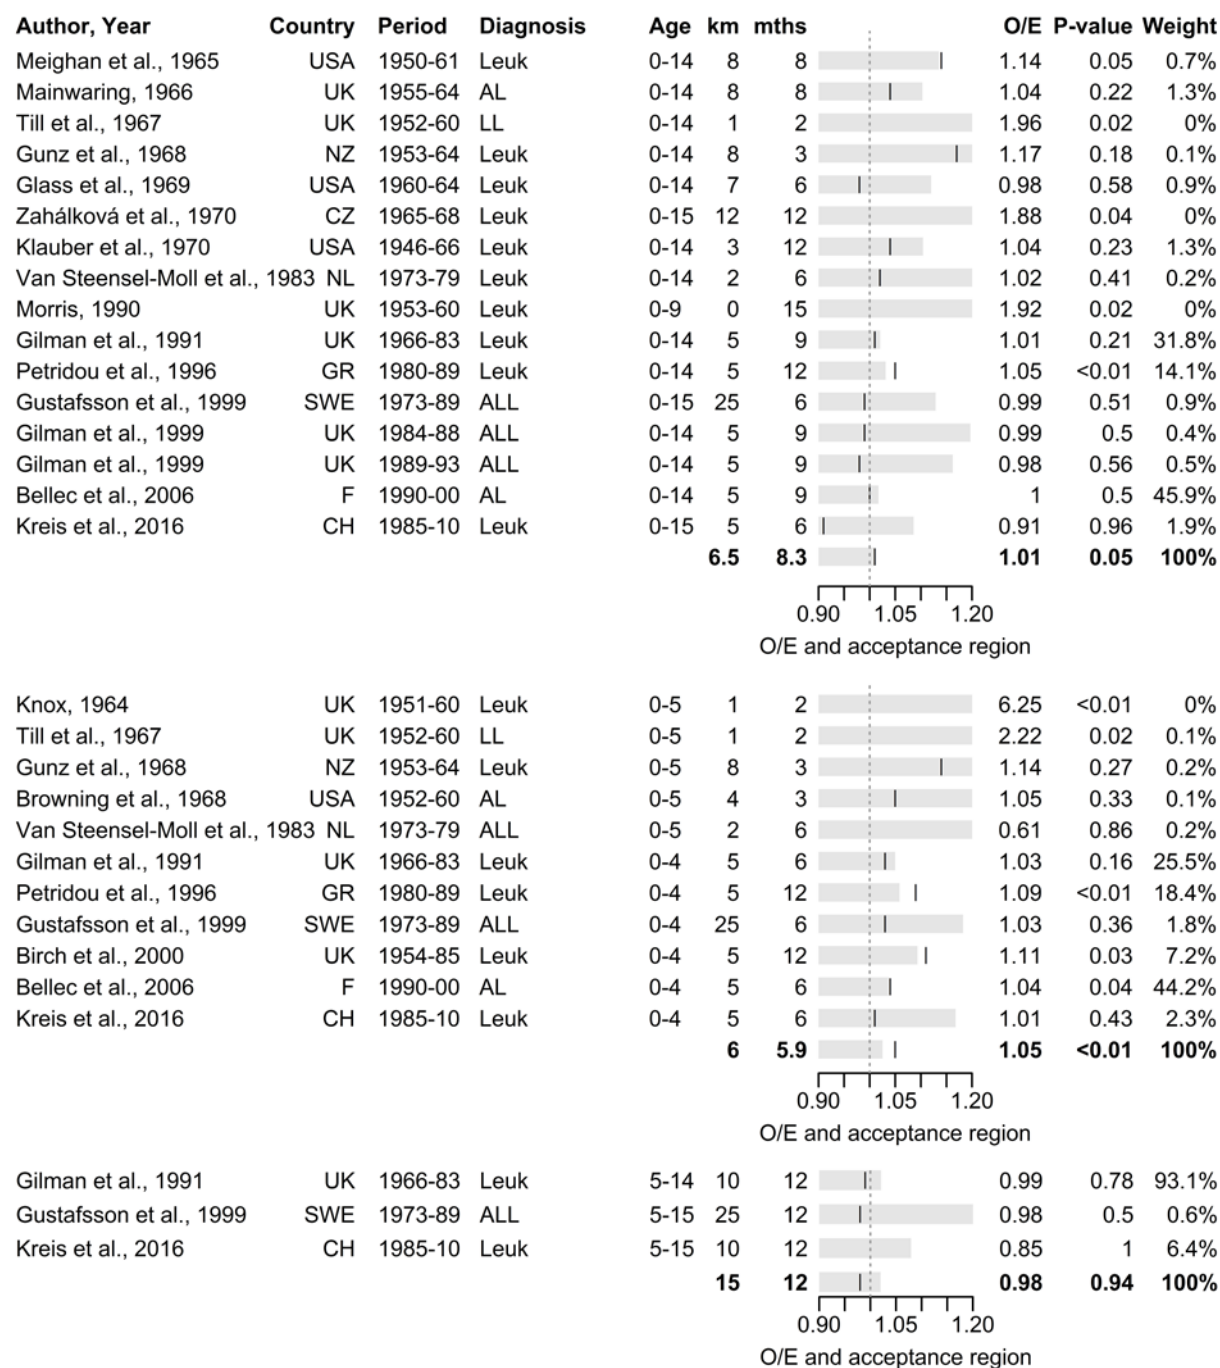

Birch et al, 2000, Gilman & Knox, 1995, Knox & Gilman, 1992 and Pinder, 1985 were excluded from the analysis of children aged 0-15 years because of overlapping study samples.

**Figure S2** Pooled analysis of space-time clustering studies of childhood leukaemia for place and time of birth for children aged **0-15 years** (top), **0-5 years** (middle) and **5-15 years** (bottom): Forrest plot of ratio of observed over expected number of close pairs of cases (O/E) and acceptance region for one-sided Knox test assuming Poisson distribution at 5% alpha-level

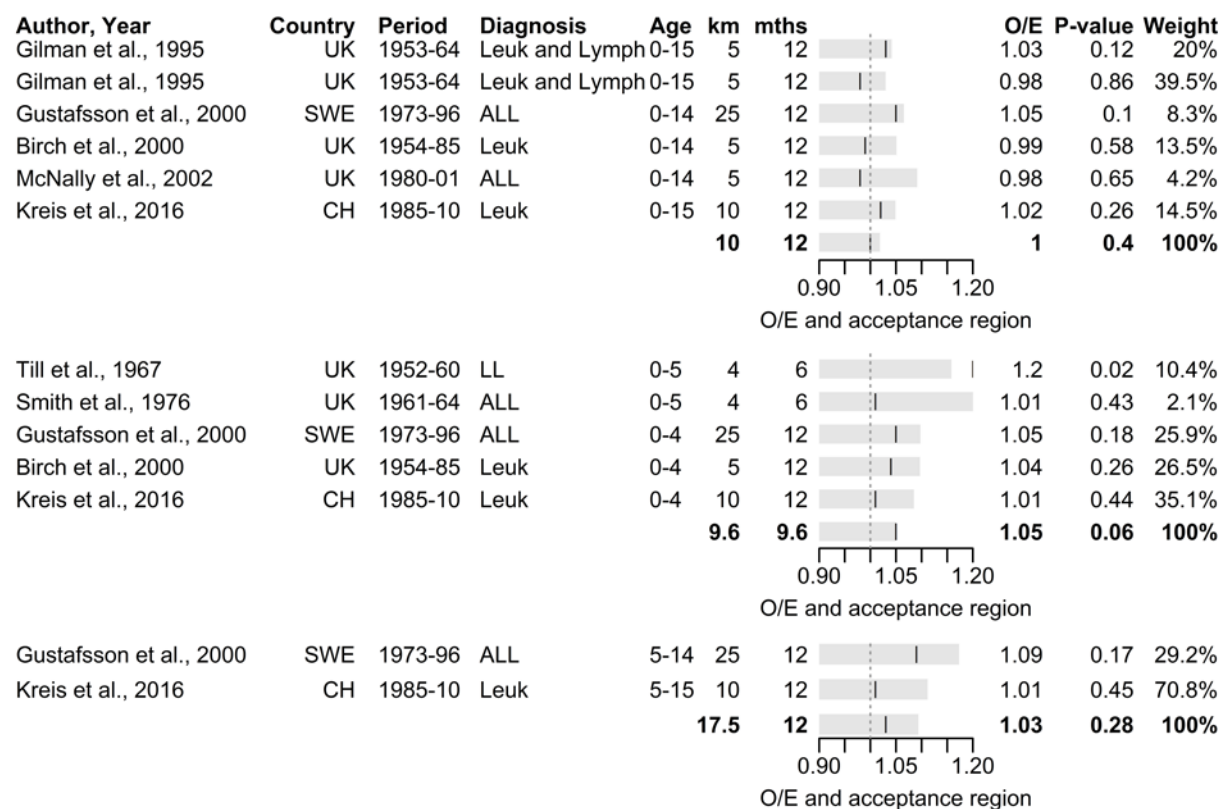

Morris, 1990 was excluded from the analysis of children aged 0-15 years because of overlapping study samples. Smith et al, 1976 (sub-period 1952-59) was excluded from the analysis of children aged 0-5 years because of overlapping study samples.

**Figure S3** Pooled analysis of space-time clustering studies of childhood **leukaemia** for place and time of **diagnosis** for children aged **0-15 years** (top) and **0-5 years** (bottom) for spatial lags of **3-7 km** and temporal lags of **6-18 months**: Forrest plot of ratio of observed over expected number of close pairs of cases (*O/E*) and acceptance region for one-sided Knox test assuming Poisson distribution at 5% alpha-level

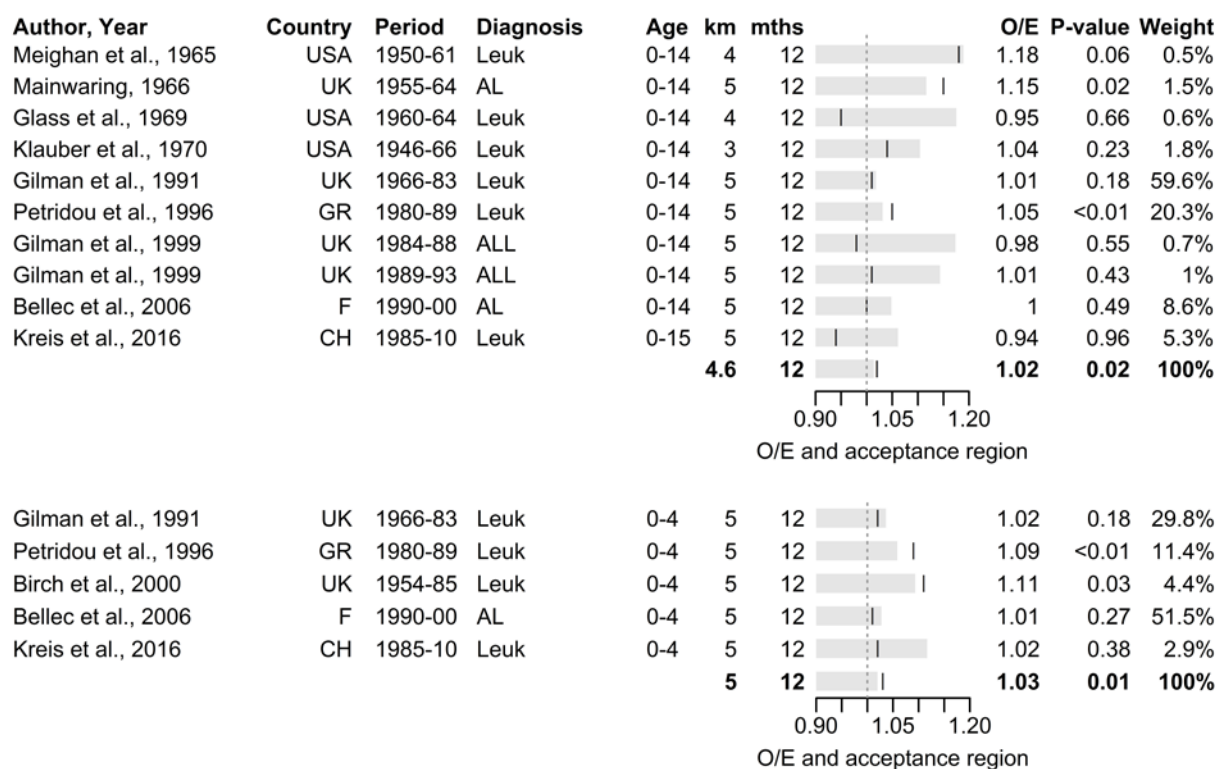

Birch et al, 2000, Gilman & Knox, 1995, Knox & Gilman, 1992 and Pinder, 1985 were excluded from the analysis of children aged 0-15 years because of overlapping study samples.

**Figure S4** Pooled analysis of space-time clustering studies of childhood **leukaemia** for place and time of **diagnosis** for children aged **0-15 years** (top) and **0-5 years** (bottom) for spatial lags of **3-7 km** and temporal lags of **12-36 months**: Forrest plot of ratio of observed over expected number of close pairs of cases (O/E) and acceptance region for one-sided Knox test assuming Poisson distribution at 5% alpha-level

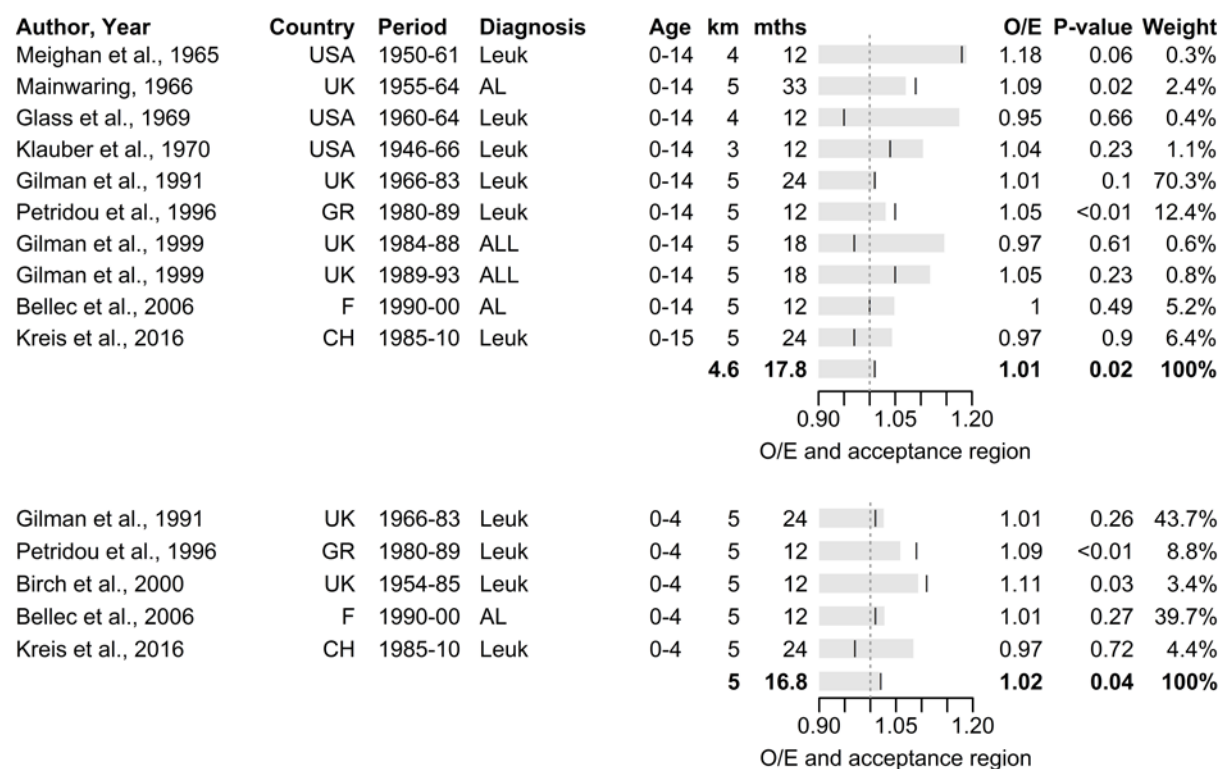

Birch et al, 2000, Gilman & Knox, 1995, Knox & Gilman, 1992 and Pinder, 1985 were excluded from the analysis of children aged 0-15 years because of overlapping study samples.

**Figure S5** Pooled analysis of space-time clustering studies of childhood **leukaemia** for place and time of **diagnosis** for children aged **0-15 years** (top) and **0-5 years** (bottom) for spatial lags of **7-15 km** and temporal lags of **0-12 months**: Forrest plot of ratio of observed over expected number of close pairs of cases (**O/E**) and acceptance region for one-sided Knox test assuming Poisson distribution at 5% alpha-level

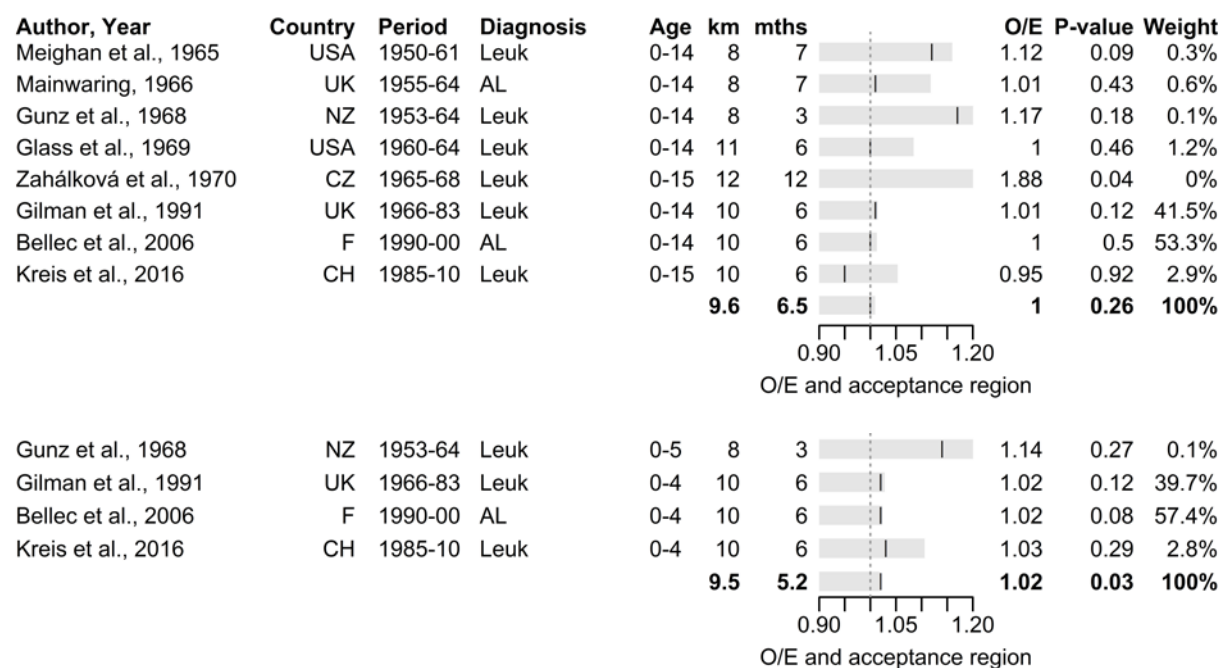

Birch et al, 2000, Gilman & Knox, 1995, Knox & Gilman, 1992 and Pinder, 1985 were excluded from the analysis of children aged 0-15 years because of overlapping study samples.

**Figure S6** Pooled analysis of space-time clustering studies of childhood ALL for place and time of diagnosis for children aged 0-15 years (top), 0-5 years (middle) and 5-15 years (bottom): Forrest plot of ratio of observed over expected number of close pairs of cases (O/E) and acceptance region for one-sided Knox test assuming Poisson distribution at 5% alpha-level

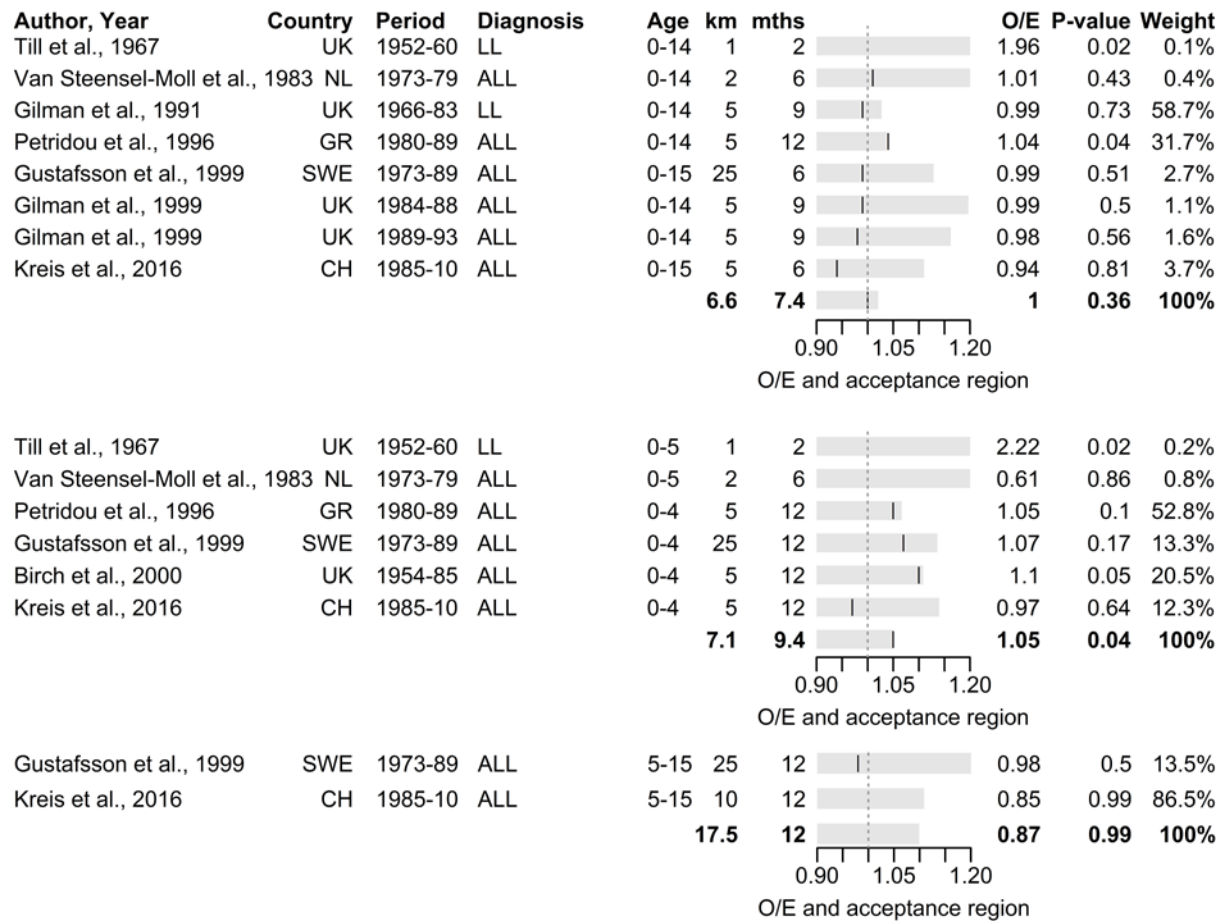

Birch et al, 2000, Gilman & Knox, 1995, Knox & Gilman, 1992 and Pinder, 1985 were excluded from the analysis of children aged 0-15 years because of overlapping study samples.

**Figure S7** Pooled analysis of space-time clustering studies of childhood **ALL** for place and time of **birth** for children aged **0-15 years** (top), **0-5 years** (middle) and **5-15 years** (bottom): Forrest plot of ratio of observed over expected number of close pairs of cases (O/E) and acceptance region for one-sided Knox test assuming Poisson distribution at 5% alpha-level

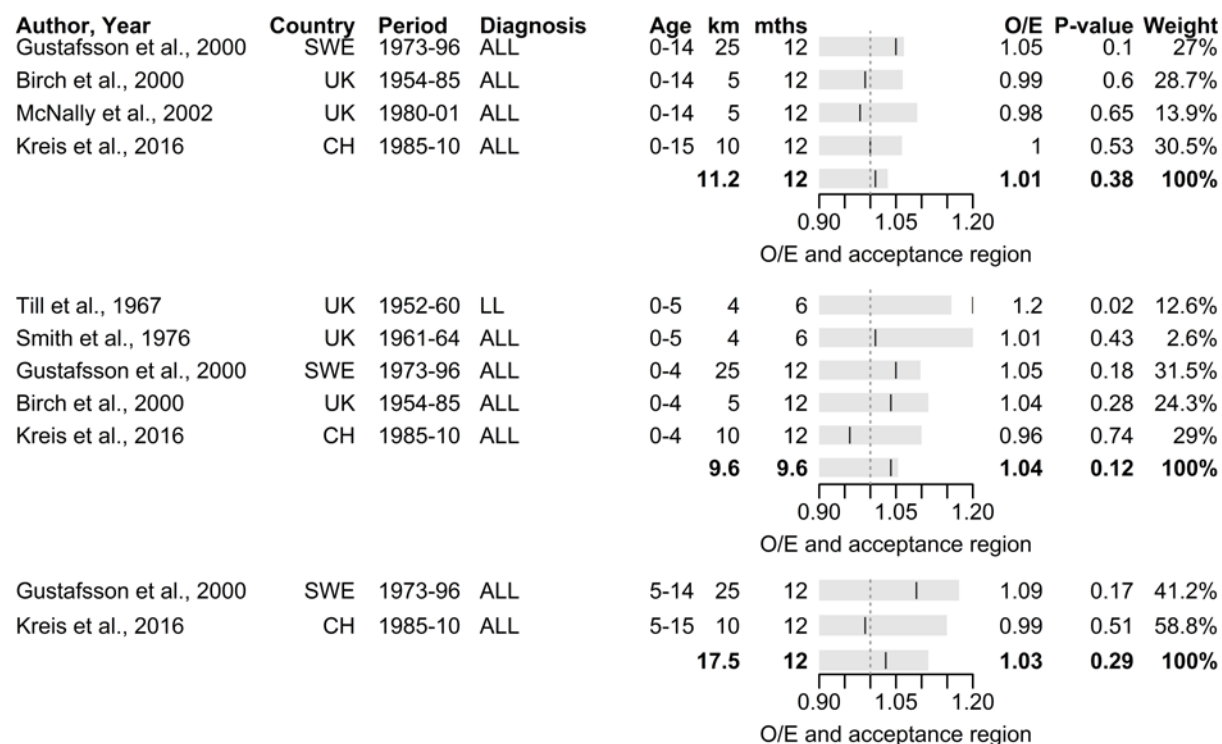

**Figure S8** Pooled analysis of space-time clustering studies of childhood **lymphoma** for place and time of **diagnosis** (top) and **birth** (upper middle), **CNS tumours** for place and time of **diagnosis** (lower middle) and for **neuroblastomas** for place and time of **birth** (bottom): Forrest plot of ratio of observed over expected number of close pairs of cases (O/E) and acceptance region for one-sided Knox test assuming Poisson distribution at 5% alpha-level

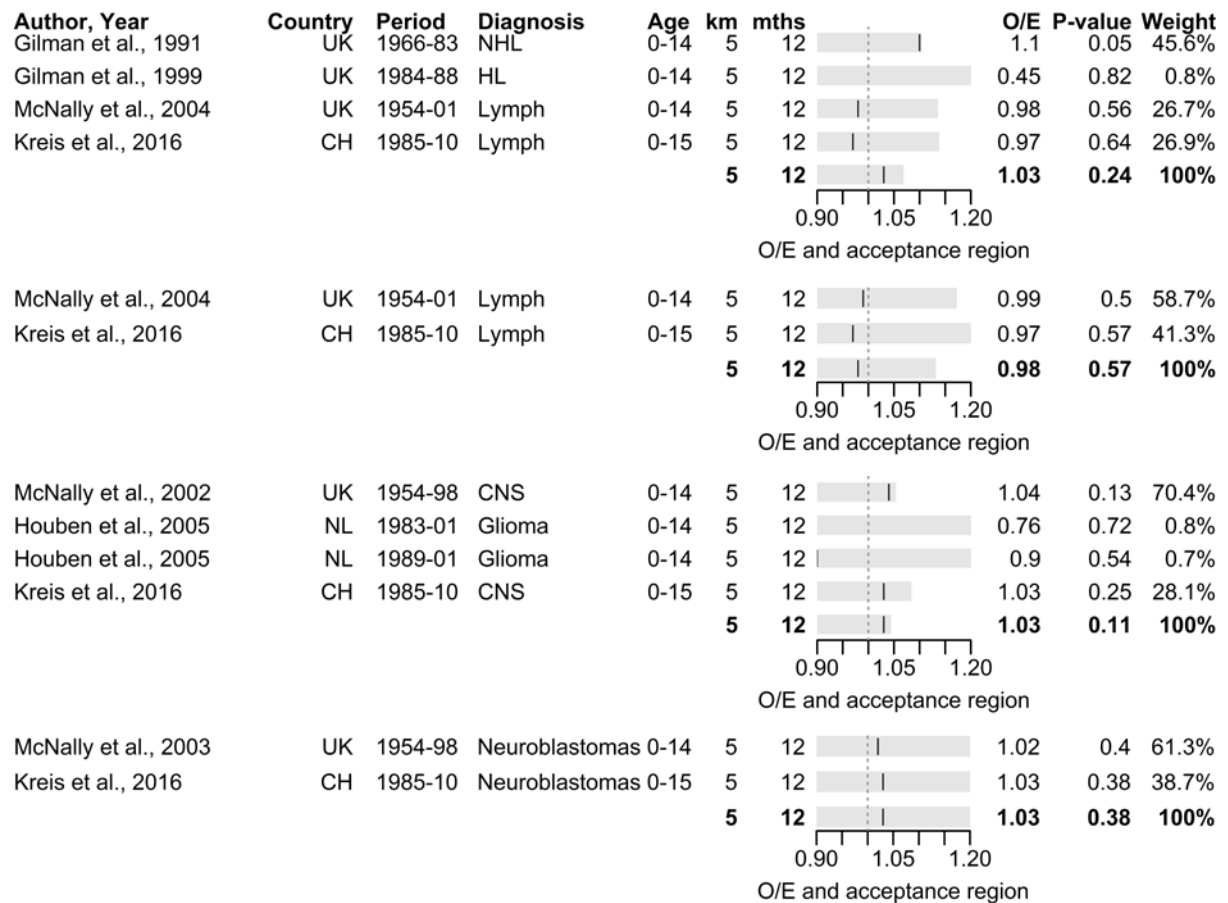

Mangoud et al, 1985 was excluded from the analysis of childhood lymphoma at time of diagnosis because of overlapping study samples.
