# Supplementary material for: Space–time clustering of childhood cancers: a systematic review and pooled analysis
Source: Springer Nature journal article supplement (doi:10.1007/s10654-018-0456-y), 2018-11-16
Supplement: MOESM3 [file 16275942]

**Table S1** Space-time clustering studies of childhood leukaemia

| Author, Year          | Study area                    | Period    | Quality | Resolution | Critical lags                                                    | Cancer type | Age  | Time | Cases | Method                 | Results                         |                               |                                                                        |
|-----------------------|-------------------------------|-----------|---------|------------|------------------------------------------------------------------|-------------|------|------|-------|------------------------|---------------------------------|-------------------------------|------------------------------------------------------------------------|
|                       |                               |           |         |            |                                                                  |             |      |      |       |                        | Rate of sig. Tests <sup>a</sup> | Significant test <sup>b</sup> |                                                                        |
| Pinkel et al., 1959   | Buffalo Area, NY, USA         | 1943-1956 | 2       | Postcodes  | s: 1/3 mile<br>t: 2 years                                        | Leuk        | 0-15 | X    | 137   | Combinatorial analysis | 0                               | (0/2)                         | n.s.                                                                   |
| Pinkel et al., 1963   | Buffalo Area, NY, USA         | 1943-1956 | 2       | Postcodes  | s: 1/8, 2/8, ..., 1 mile<br>t: not specified                     | Leuk        | 0-15 | X    | 206   | Average ridit          | 0.125                           | (1/8)                         | Leuk, 0-15y, 1/8m                                                      |
| Ederer et al., 1964   | State of Connecticut, USA     | 1945-1959 | 1       | Areas      | s: same town<br>t: 1, 2 years                                    | Leuk        | 0-14 | X    | 333   | E-M-M                  | 0                               | (0/2)                         | n.s.                                                                   |
| Knox, 1964            | Northumberland and Durham, UK | 1951-1960 | 1       | Areas      | s: 1, >1 km<br>t: 2 months                                       | Leuk        | 0-14 | X    | 185   | Knox                   | 0                               | (0/NA)                        | Leuk, 0-5y, 1km, 2mths                                                 |
|                       |                               |           |         |            |                                                                  | ML          | 0-14 | X    | 46    | Knox                   | 0                               | (0/NA)                        |                                                                        |
|                       |                               |           |         |            |                                                                  | LL          | 6-14 | X    | 50    | Knox                   | 0                               | (0/NA)                        |                                                                        |
|                       |                               |           |         |            |                                                                  | Leuk        | 0-5  | X    | 96    | Knox                   | NA                              | (1/NA)                        |                                                                        |
| Meighan et al., 1965  | Portland, Oregon, USA         | 1950-1961 | 1       | Geocodes   | s: 1, 2, 4, 8 km<br>t: 50, 100, ..., 300, 365 days               | Leuk        | 0-14 | X    | 69    | Knox                   | 0.071                           | (2/28)                        | Leuk, 0-14y, 4km, 250d                                                 |
| Ederer et al., 1965   | State of Connecticut, USA     | 1945-1959 | 2       | Areas      | s: same town<br>t: 1, 2 years                                    | Leuk        | 0-14 | X    | 448   | E-M-M                  | 0                               | (0/2)                         | n.s.                                                                   |
| Fraumeni et al., 1966 | Upper New York State, USA     | 1943-1962 | 1       | Areas      | s: same town<br>t: 1, 2 years                                    | Leuk        | 0-14 | X    | 1640  | E-M-M                  | 1                               | (2/2)                         | Leuk, 0-14y, same t., 1y; Leuk, 0-4y, same t., 2y                      |
|                       |                               |           |         |            |                                                                  | Leuk        | 0-9  | X    | 1368  | E-M-M                  | 0                               | (0/2)                         |                                                                        |
|                       |                               |           |         |            |                                                                  | Leuk        | 0-4  | X    | 816   | E-M-M                  | 1                               | (2/2)                         |                                                                        |
| Mainwaring, 1966      | Liverpool Area, UK            | 1955-1964 | 1       | Geocodes   | s: 2, 3, 4, 5, 8 km<br>t: 50, 100, ..., 400, 1000 days           | AL          | 0-14 | X    | 74    | Knox                   | 0.2                             | (9/45)                        | AL, 0-14y, 4km, 300d                                                   |
|                       |                               |           |         |            |                                                                  | AL          | 0-5  | X    | 37    | Knox                   | NA                              | (NA/NA)                       |                                                                        |
|                       |                               |           |         |            |                                                                  | AL          | 6-14 | X    | 37    | Knox                   | NA                              | (NA/NA)                       |                                                                        |
| Stark et al., 1967    | State of Michigan, USA        | 1950-1963 | 0       | Areas      | s: state; same county<br>t: 3, 4 years                           | Leuk        | 0-4  | B    | 375   | E-M-M                  | 0                               | (0/1)                         | n.s.                                                                   |
|                       |                               |           |         |            |                                                                  | Leuk        | 0-1  | B    | 77    | E-M-M                  | 0                               | (0/1)                         |                                                                        |
| Till et al., 1967     | Greater London, UK            | 1952-1960 | 2       | Geocodes   | s: 0.25, 0.5, ..., 2, 2.5, ..., 4 km<br>t: 0.5, 1, ..., 6 months | Leuk        | 0-14 | X    | 444   | Knox                   | 0                               | (0/144)                       | B: Knox: LL, 0-5y, 3.5km, 6mths<br>X: Knox: LL, 0-14y, 0.75km, 2.5mths |
|                       |                               |           |         |            |                                                                  | Leuk        | 0-5  | X    | 315   | Knox                   | 0                               | (0/144)                       |                                                                        |
|                       |                               |           |         |            |                                                                  | LL          | 0-14 | X    | 346   | Knox                   | 0.007                           | (1/144)                       |                                                                        |
|                       |                               |           |         |            |                                                                  | LL          | 0-5  | X    | 252   | Knox                   | 0                               | (0/144)                       |                                                                        |
|                       |                               |           |         |            |                                                                  | Leuk        | 0-5  | B    | 292   | Knox                   | 0                               | (0/144)                       |                                                                        |
|                       |                               |           |         |            |                                                                  | LL          | 0-5  | B    | 232   | Knox                   | 0.056                           | (8/144)                       |                                                                        |
|                       |                               |           |         |            |                                                                  | Leuk        | 0-14 | X    | 444   | David & Barton 1966    | 0                               | (0/144)                       |                                                                        |
|                       |                               |           |         |            |                                                                  | Leuk        | 0-5  | X    | 315   | David & Barton 1966    | 0                               | (0/144)                       |                                                                        |
|                       |                               |           |         |            |                                                                  | LL          | 0-14 | X    | 346   | David & Barton 1966    | 0                               | (0/144)                       |                                                                        |
| Gunz et al., 1968     | New Zealand                   | 1953-1964 | 1       | Postcodes  | s: 1, 5, 10 miles<br>t: 2, 3, 6 months                           | Leuk        | 0-14 | X    | 288   | Knox                   | 0                               | (0/4)                         | Leuk, 0-5y, 1m, 2mths                                                  |
|                       |                               |           |         |            |                                                                  | Leuk        | 0-5  | X    | 160   | Knox                   | 0.5                             | (2/4)                         |                                                                        |

Table S1 continued

| Author, Year           | Study area                               | Period    | Quality | Resolution | Critical lags                                                                                                     | Cancer type | Age  | Time | Cases | Method                                | Results                         |                               |                                                                                                                                                   |
|------------------------|------------------------------------------|-----------|---------|------------|-------------------------------------------------------------------------------------------------------------------|-------------|------|------|-------|---------------------------------------|---------------------------------|-------------------------------|---------------------------------------------------------------------------------------------------------------------------------------------------|
|                        |                                          |           |         |            |                                                                                                                   |             |      |      |       |                                       | Rate of sig. Tests <sup>a</sup> | Significant test <sup>b</sup> |                                                                                                                                                   |
| Browning et al., 1968  | Cuyahoga County, Ohio, USA               | 1955-1965 | 0       | Areas      | s: 1, 2, 4 km<br>t: 60, 90 days                                                                                   | AL          | 0-14 | X    | 168   | Knox                                  | 0                               | (0/6)                         | n.s.                                                                                                                                              |
| Glass et al., 1968     | Los Angeles County, USA                  | 1960-1964 | 1       | Geocodes   | s: same census region<br>t: 1 year                                                                                | Leuk        | 0-14 | X    | 298   | E-M-M                                 | 0                               | (0/1)                         | n.s.                                                                                                                                              |
| Klauber, 1968          | State of California, USA                 | 1958-1960 | 1       | Areas      | s: same hospital<br>t: 1, 3, 5, 15, 30 days                                                                       | Leuk        | 0-4  | B    | NA    | Mantel                                | 0                               | (0/5)                         | n.s.                                                                                                                                              |
| Glass et al., 1969     | Los Angeles County, USA                  | 1960-1964 | 1       | Postcodes  | s: Knox: 0.53-13.2 km; M: 0.09-6.6 km<br>t: 0.5, 1, 2, 4, 6, 12 months                                            | Leuk        | 0-14 | X    | 298   | Knox                                  | 0                               | (0/48)                        | n.s.                                                                                                                                              |
|                        |                                          |           |         |            |                                                                                                                   | Leuk        | 0-5  | X    | 155   | Knox                                  | 0                               | (0/48)                        |                                                                                                                                                   |
|                        |                                          |           |         |            |                                                                                                                   | Leuk        | 2-9  | X    | 205   | Knox                                  | 0                               | (0/48)                        |                                                                                                                                                   |
|                        |                                          |           |         |            |                                                                                                                   | Leuk        | 0-14 | X    | 298   | Mantel                                | 0                               | (0/60)                        |                                                                                                                                                   |
|                        |                                          |           |         |            |                                                                                                                   | Leuk        | 0-5  | X    | 155   | Mantel                                | 0                               | (0/60)                        |                                                                                                                                                   |
|                        |                                          |           |         |            |                                                                                                                   | Leuk        | 2-9  | X    | 205   | Mantel                                | 0                               | (0/60)                        |                                                                                                                                                   |
| Klauber et al., 1970   | San Francisco, USA                       | 1946-1966 | 2       | Geocodes   | s: M: average distance; Knox: 0.25, 0.5, 1, 2 miles<br>t: M: 0.5, 1, 2, 4, 12 months;<br>K: 30, 60, 120, 365 days | Leuk        | 0-14 | X    | 149   | Mantel                                | 0                               | (0/5) <sup>1</sup>            | M: Leuk, 2-14y, 12mths                                                                                                                            |
|                        |                                          |           |         |            |                                                                                                                   | Leuk        | 2-14 | X    | 121   | Mantel                                | 0.2                             | (1/5) <sup>1</sup>            |                                                                                                                                                   |
| Bailar et al., 1970    | State of Connecticut, USA                | 1935-1963 | 0       | Areas      | s: same town<br>t: 1, 2, ..., 28 years                                                                            | Leuk        | 0-14 | X    | 4552  | E-M-M (modified)                      | 0                               | (0/NA)                        | n.s.                                                                                                                                              |
| Zahálková et al., 1970 | South Moravian Province, Czech Republic  | 1960-1968 | 0       | Areas      | s: 10, 12, 15 km<br>t: 1, 2 years                                                                                 | Leuk        | 0-15 | X    | 104   | Knox                                  | 0.5                             | (3/6)                         | Leuk, 0-15y, 12km, 2y                                                                                                                             |
| Glass et al., 1971     | New Zealand                              | 1952-1963 | 2       | Geocodes   | s: 0.5, 1, 2, 3, 5 miles<br>t: 0.5, 1, 2, 3, 6 months                                                             | AL*         | 0-14 | X    | 288   | Knox                                  | 0.56                            | (14/25)                       | Knox: AL, 0-14y, 1m, 1mth; AL, 0-5y, 1m, 0.5mth; AL, 2-9y, 0.5m, 1mth; M: AL, 0-14y, 0.5m, 0.5mth; AL, 0-5y, 0.5m, 0.5mth; AL, 2-9y, 0.5m, 0.5mth |
|                        |                                          |           |         |            |                                                                                                                   | AL*         | 0-5  | X    | 160   | Knox                                  | 0.68                            | (17/25)                       |                                                                                                                                                   |
|                        |                                          |           |         |            |                                                                                                                   | AL*         | 2-9  | X    | 202   | Knox                                  | 0.24                            | (6/25)                        |                                                                                                                                                   |
|                        |                                          |           |         |            |                                                                                                                   | AL*         | 0-14 | X    | 288   | Mantel                                | 0.96                            | (24/25)                       |                                                                                                                                                   |
|                        |                                          |           |         |            |                                                                                                                   | AL*         | 0-5  | X    | 160   | Mantel                                | 0.48                            | (12/25)                       |                                                                                                                                                   |
|                        |                                          |           |         |            |                                                                                                                   | AL*         | 2-9  | X    | 202   | Mantel                                | 0.36                            | (9/25)                        |                                                                                                                                                   |
| Evatt et al., 1973     | DeKalb and Fulton Counties, Georgia, USA | 1956-1968 | 2       | Areas      | s: same census tract<br>t: 2, 3 years                                                                             | AL          | 0-14 | X    | 96    | Pearsons Chi-square, Haldanes moments | 0.5                             | (2/4) <sup>2</sup>            | AL, 0-14, 2y, DeKalb, 56-67; AL, 0-14, 2y, Fulton, 56-67; AL, 0-14, 2y, both, 56-67                                                               |
| Larsen et al., 1973    | Metropolitan Atlanta, Georgia, USA       | 1956-1969 | 2       | Areas      | s: same census tract<br>t: 6 months                                                                               | AL          | 0-14 | X    | 164   | K statistic                           | 1                               | (1/1)                         | K statistic: AL, 0-14y, 6 census tracts                                                                                                           |
|                        |                                          |           |         |            |                                                                                                                   | AL          | 0-14 | X    | 164   | Knox                                  | 0                               | (0/NA)                        |                                                                                                                                                   |
|                        |                                          |           |         |            |                                                                                                                   | AL          | 0-14 | X    | 164   | Mantel                                | 0                               | (0/NA)                        |                                                                                                                                                   |
|                        |                                          |           |         |            |                                                                                                                   | ALL         | 0-14 | X    | 124   | K statistic                           | 1                               | (1/1)                         |                                                                                                                                                   |
|                        |                                          |           |         |            |                                                                                                                   | ALL         | 0-14 | X    | 124   | Knox                                  | 0                               | (0/NA)                        |                                                                                                                                                   |
|                        |                                          |           |         |            |                                                                                                                   | ALL         | 0-14 | X    | 124   | Mantel                                | 0                               | (0/NA)                        |                                                                                                                                                   |

Table S1 continued

| Author, Year                   | Study area                                                  | Period    | Quality | Resolution | Critical lags                                                         | Cancer type | Age  | Time | Cases             | Method      | Results                         |                                                                                                          |
|--------------------------------|-------------------------------------------------------------|-----------|---------|------------|-----------------------------------------------------------------------|-------------|------|------|-------------------|-------------|---------------------------------|----------------------------------------------------------------------------------------------------------|
|                                |                                                             |           |         |            |                                                                       |             |      |      |                   |             | Rate of sig. Tests <sup>a</sup> | Significant test <sup>b</sup>                                                                            |
|                                |                                                             |           |         |            |                                                                       | AL**        | 0-14 | X    | 23                | K statistic | 0                               | (0/1)                                                                                                    |
|                                |                                                             |           |         |            |                                                                       | AL**        | 0-14 | X    | 23                | Knox        | 0                               | (0/NA)                                                                                                   |
|                                |                                                             |           |         |            |                                                                       | AL**        | 0-14 | X    | 23                | Mantel      | 0                               | (0/NA)                                                                                                   |
| Smith et al., 1976             | Greater London, UK                                          | 1952-1965 | 3       | Geocodes   | s: 0.25, 0.5, ..., 2, 2.5, ..., 4 km<br>t: 0.5, 1, ..., 6 months      | ALL         | 0-5  | B    | 172               | Knox        | 0.028                           | (4/144) <sup>3</sup>                                                                                     |
|                                |                                                             |           |         |            |                                                                       | ALL         | 0-5  | B    | 81                | Knox        | 0                               | (0/144) <sup>4</sup>                                                                                     |
| Van Steensel-Moll et al., 1983 | Western Part of the Netherlands                             | 1973-1980 | 1       | Areas      | s: 2, 4, 6, 8, 10 km<br>t: 2, 4, 6, 8, 10, 12 months                  | Leuk        | 0-14 | X    | 293               | Mantel      | 0                               | (0/1)                                                                                                    |
|                                |                                                             |           |         |            |                                                                       | ALL         | 0-14 | X    | 233               | Mantel      | 0                               | (0/1)                                                                                                    |
|                                |                                                             |           |         |            |                                                                       | ALL         | 0-5  | X    | 159               | Mantel      | 0                               | (0/1)                                                                                                    |
|                                |                                                             |           |         |            |                                                                       | ANLL        | 0-14 | X    | 49                | Mantel      | 0                               | (0/1)                                                                                                    |
|                                |                                                             |           |         |            |                                                                       | Leuk        | 0-14 | X    | 293               | Knox        | 0                               | (0/30)                                                                                                   |
|                                |                                                             |           |         |            |                                                                       | ALL         | 0-14 | X    | 233               | Knox        | 0                               | (0/30)                                                                                                   |
|                                |                                                             |           |         |            |                                                                       | ALL         | 0-5  | X    | 159               | Knox        | 0                               | (0/30)                                                                                                   |
|                                |                                                             |           |         |            |                                                                       | ANLL        | 0-14 | X    | 49                | Knox        | 0                               | (0/30)                                                                                                   |
| Pinder, 1985                   | Mersey Region, UK                                           | 1974-1983 | 2       | Postcodes  | s: 0.5, 1, 2, 4, >=4 km<br>t: 1, 2, 4, 8, 12, 24, 48, >48 months      | Leuk        | 0-14 | X    | 165               | X2          | 0                               | (0/1)                                                                                                    |
|                                |                                                             |           |         |            |                                                                       | Leuk        | 0-6  | X    | 85                | X2          | 0                               | (0/1)                                                                                                    |
|                                |                                                             |           |         |            |                                                                       | LL          | 0-14 | X    | 125               | X2          | 0                               | (0/1)                                                                                                    |
|                                |                                                             |           |         |            |                                                                       | LL          | 0-6  | X    | 65                | X2          | 0                               | (0/1)                                                                                                    |
| Morris, 1990                   | Worcestershire, Warwickshire, Staffordshire, Shropshire; UK | 1953-1960 | 2       | Geocodes   | s: not specified<br>t: not specified                                  | Leuk        | 0-6  | B    | 162               | Knox        | NA                              | (1/NA)                                                                                                   |
|                                |                                                             |           |         |            |                                                                       | Leuk        | 0-9  | X    | 228               | Knox        | NA                              | (1/NA)                                                                                                   |
|                                |                                                             |           |         |            |                                                                       |             |      |      |                   |             |                                 | B: Leuk, 0-6y, 2km, 248d<br>X: Leuk, 0-9y, 0.5km, 15mths                                                 |
| Gilman et al., 1991            | England, Scotland and Wales, UK                             | 1966-1983 | 3       | Postcodes  | s: 1, 2, 3, 4, 5, 10, 20 km<br>t: 0, 1, ..., 9, 12, 18, 24, 48 months | LL          | 0-14 | X    | 5710              | Knox        | 0.036                           | (3/84) <sup>5</sup>                                                                                      |
|                                |                                                             |           |         |            |                                                                       | ANLL        | 0-14 | X    | 1241              | Knox        | 0.06                            | (5/84) <sup>5</sup>                                                                                      |
|                                |                                                             |           |         |            |                                                                       | LL*         | 0-14 | X    | 6094              | Knox        | 0.024                           | (2/84) <sup>5</sup>                                                                                      |
|                                |                                                             |           |         |            |                                                                       | Leuk        | 0-14 | X    | 7565              | Knox        | 0.024                           | (2/84) <sup>5</sup>                                                                                      |
|                                |                                                             |           |         |            |                                                                       | Leuk        | 0-4  | X    | 3856              | Knox        | 0.06                            | (5/84) <sup>5</sup>                                                                                      |
|                                |                                                             |           |         |            |                                                                       | Leuk        | 5-14 | X    | 3709              | Knox        | 0                               | (0/84) <sup>5</sup>                                                                                      |
| Knox et al., 1992              | England, Wales and Scotland, UK                             | 1966-1983 | 3       | Postcodes  | s: 0.5, 1, 1.5, 2, 5, 20, 100 km<br>t: 0.5, 1, 2, 4, 12 months        | Leuk+Lymph  | 0-14 | X    | 8888              | Knox        | 0.143                           | (6/42)                                                                                                   |
|                                |                                                             |           |         |            |                                                                       | LL*         | 0-14 | X    | NA                | Knox        | 0.071                           | (3/42)                                                                                                   |
|                                |                                                             |           |         |            |                                                                       | Leuk+Lymph  | 0-3  | X    | NA                | Knox        | 0                               | (0/42)                                                                                                   |
|                                |                                                             |           |         |            |                                                                       | Leuk+Lymph  | 4-7  | X    | NA                | Knox        | 0.095                           | (4/42)                                                                                                   |
|                                |                                                             |           |         |            |                                                                       | Leuk+Lymph  | 8-13 | X    | NA                | Knox        | 0                               | (0/42)                                                                                                   |
|                                |                                                             |           |         |            |                                                                       |             |      |      |                   |             |                                 | Leuk&Lymph, 0-14y, 0.5km, 2mths;<br>LL&unsp.Leuk, 0-14y, 0.5km, 0.5mth,<br>Leuk&Lymph, 4-7y, 1.5km, 1mth |
| Schneider et al., 1993         | New Jersey, USA                                             | 1979-1985 | 2       | Areas      | s: same minor civil division (town)<br>t: 7, 14 months                | Leuk        | 0-14 | X    | 5500 <sup>6</sup> | E-M-M       | 0.5                             | (1/2)                                                                                                    |
|                                |                                                             |           |         |            |                                                                       |             |      |      |                   |             |                                 | Leuk, 0-14y, 7mths                                                                                       |

Table S1 continued

| Author, Year            | Study area                                                 | Period    | Quality | Resolution         | Critical lags                                                                                      | Cancer type | Age   | Time | Cases | Method             | Results                         |                               |                                                                                                                                                                                                                                        |                        |
|-------------------------|------------------------------------------------------------|-----------|---------|--------------------|----------------------------------------------------------------------------------------------------|-------------|-------|------|-------|--------------------|---------------------------------|-------------------------------|----------------------------------------------------------------------------------------------------------------------------------------------------------------------------------------------------------------------------------------|------------------------|
|                         |                                                            |           |         |                    |                                                                                                    |             |       |      |       |                    | Rate of sig. Tests <sup>a</sup> | Significant test <sup>b</sup> |                                                                                                                                                                                                                                        |                        |
| Gilman et al., 1995     | England, Wales and Scotland, UK                            | 1953-1980 | 3       | Postcodes          | s: 1, 2, 3, 4, 5, 10, 20 km<br>t: 0, 1, ..., 6, 9, 12, 18, 24, 48 months                           | Leuk+Lymph  | 0-15  | B    | 1435  | Knox               | 0.022                           | (1/45) <sup>7</sup>           | B: Leuk+Lymph, 0-15y, 53-64, central Britain, 2km, 1mth, Leuk+Lymph, 0-15y, 53-64, outside central Britain, 1km, 3mths<br>X: Leuk+Lymph, 0-15y, central Britain, 2km, 2mths, Leuk+Lymph, 0-15y, outside central Britain, 4km, same mth |                        |
|                         |                                                            |           |         |                    |                                                                                                    | Leuk+Lymph  | 0-15  | B    | 2478  | Knox               | 0.044                           | (2/45) <sup>8</sup>           |                                                                                                                                                                                                                                        |                        |
|                         |                                                            |           |         |                    |                                                                                                    | Leuk+Lymph  | 0-15  | X    | 3862  | Knox               | 0.067                           | (3/45) <sup>7</sup>           |                                                                                                                                                                                                                                        |                        |
|                         |                                                            |           |         |                    |                                                                                                    | Leuk+Lymph  | 0-15  | X    | 6511  | Knox               | 0.178                           | (8/45) <sup>8</sup>           |                                                                                                                                                                                                                                        |                        |
| Petridou et al., 1996   | Greece                                                     | 1980-1989 | 2       | Geocodes           | s: Knox: 5 km; Global: 0.5-7.5 km<br>t: Knox: 1 year; Global: 1-15 months                          | Leuk        | 0-14  | X    | 872   | Knox               | 0.667                           | (2/3)                         | Knox: Leuk, 0-14y, 5km, 1y; Leuk, 0-4y, 5km, 1y; ALL, 0-14y, 5km, 1y; Global: Leuk, 0-14y; Leuk, 0-4y                                                                                                                                  |                        |
|                         |                                                            |           |         |                    |                                                                                                    | Leuk        | 0-4   | X    | 446   | Knox               | 1                               | (3/3)                         |                                                                                                                                                                                                                                        |                        |
|                         |                                                            |           |         |                    |                                                                                                    | Leuk        | 5-9   | X    | 278   | Knox               | 0                               | (0/3)                         |                                                                                                                                                                                                                                        |                        |
|                         |                                                            |           |         |                    |                                                                                                    | Leuk        | 10-14 | X    | 148   | Knox               | 0                               | (0/3)                         |                                                                                                                                                                                                                                        |                        |
|                         |                                                            |           |         |                    |                                                                                                    | ALL         | 0-14  | X    | 739   | Knox               | 0.667                           | (2/3)                         |                                                                                                                                                                                                                                        |                        |
|                         |                                                            |           |         |                    |                                                                                                    | ALL         | 0-4   | X    | 392   | Knox               | 0                               | (0/3)                         |                                                                                                                                                                                                                                        |                        |
|                         |                                                            |           |         |                    |                                                                                                    | ALL         | 5-9   | X    | 239   | Knox               | 0                               | (0/3)                         |                                                                                                                                                                                                                                        |                        |
|                         |                                                            |           |         |                    |                                                                                                    | ALL         | 10-14 | X    | 108   | Knox               | 0                               | (0/3)                         |                                                                                                                                                                                                                                        |                        |
|                         |                                                            |           |         |                    |                                                                                                    | Leuk        | 0-14  | X    | 872   | Bhopal et al. 1992 | 1                               | (1/1)                         |                                                                                                                                                                                                                                        |                        |
| Leuk                    | 0-4                                                        | X         | 446     | Bhopal et al. 1992 | 1                                                                                                  | (1/1)       |       |      |       |                    |                                 |                               |                                                                                                                                                                                                                                        |                        |
| Alexander et al., 1998  | 13 European Countries and Queensland, Australia (Euroclus) | 1980-1989 | 1       | Areas              | s: same small census area<br>t: 1.5 years (ALL, 2-4 years; Lk, 0-1 year), 2 years (Lk, 5-14 years) |             |       |      | X     | 970                | Knox                            | NA                            | (NA/NA) <sup>9</sup>                                                                                                                                                                                                                   | ALL, 2-4y; Leuk, 5-14y |
| Gustafsson et al., 1999 | Sweden                                                     | 1973-1989 | 2       | Areas              | s: same municipality<br>t: 1, 3, 6, 12, 24 months                                                  | AL***       | 0-15  | B    | 645   | Knox               | 0                               | (0/5)                         | B: ALL, 5-15y, same m., 1mth<br>X: n.s.                                                                                                                                                                                                |                        |
|                         |                                                            |           |         |                    |                                                                                                    | AL***       | 0-4   | B    | NA    | Knox               | 0                               | (0/5)                         |                                                                                                                                                                                                                                        |                        |
|                         |                                                            |           |         |                    |                                                                                                    | AL***       | 5-15  | B    | NA    | Knox               | 1                               | (1/1)                         |                                                                                                                                                                                                                                        |                        |
|                         |                                                            |           |         |                    |                                                                                                    | AL***       | 0-15  | X    | 645   | Knox               | 0                               | (0/5)                         |                                                                                                                                                                                                                                        |                        |
|                         |                                                            |           |         |                    |                                                                                                    | AL***       | 0-4   | X    | NA    | Knox               | 0                               | (0/5)                         |                                                                                                                                                                                                                                        |                        |
|                         |                                                            |           |         |                    |                                                                                                    | AL***       | 5-15  | X    | NA    | Knox               | 0                               | (0/5)                         |                                                                                                                                                                                                                                        |                        |
| Gilman et al., 1999     | England and Wales, UK (approx. 40%)                        | 1984-1993 | 3       | Postcodes          | s: 1, 2, 3, 4, 5 km<br>t: 1, 2, ..., 6, 9, 12, 18 months                                           | ALL         | 0-14  | X    | 255   | Knox               | 0.12                            | (6/50) <sup>10</sup>          | ALL, 0-14y, 84-88, 1km, 6mths; ALL, 0-14y, 89-93, 4km, same mth                                                                                                                                                                        |                        |
|                         |                                                            |           |         |                    |                                                                                                    | ALL         | 0-14  | X    | 290   | Knox               | 0.02                            | (1/50) <sup>11</sup>          |                                                                                                                                                                                                                                        |                        |

Table S1 continued

| Author, Year       | Study area                                                        | Period    | Quality | Resolution | Critical lags                                                           | Cancer type | Age   | Time | Cases | Method | Results                         |                               |                         |
|--------------------|-------------------------------------------------------------------|-----------|---------|------------|-------------------------------------------------------------------------|-------------|-------|------|-------|--------|---------------------------------|-------------------------------|-------------------------|
|                    |                                                                   |           |         |            |                                                                         |             |       |      |       |        | Rate of sig. Tests <sup>a</sup> | Significant test <sup>b</sup> |                         |
| Birch et al., 2000 | Greater Manchester, Lancashire, Cheshire, Cumbria, Derbyshire, UK | 1954-1985 | 3       | Geocodes   | s: Knox: 5 km, NN=b75/x68; K-f: 0.5-7.5 km, NN=71-85/63-77<br>t: 1 year | Leuk        | 0-14  | B    | 798   | Knox   | 0                               | (0/2)                         | B: n.s.                 |
|                    |                                                                   |           |         |            |                                                                         | Leuk        | 0-14  | B    | 798   | K-f    | 0                               | (0/2)                         | X: Knox: Leuk, 0-14y,   |
|                    |                                                                   |           |         |            |                                                                         | Leuk        | 0-4   | B    | 410   | Knox   | 0                               | (0/2)                         | 5km, 1y; Leuk, 0-4y,    |
|                    |                                                                   |           |         |            |                                                                         | Leuk        | 0-4   | B    | 410   | K-f    | 0                               | (0/2)                         | 5km, 1y; K-f: Leuk, 0-  |
|                    |                                                                   |           |         |            |                                                                         | Leuk        | 5-9   | B    | 230   | Knox   | NA                              | (NA/NA)                       | 14y, km; Leuk, 0-14y,   |
|                    |                                                                   |           |         |            |                                                                         | Leuk        | 5-9   | B    | 230   | K-f    | NA                              | (NA/NA)                       | NN; Leuk, 0-4y, km;     |
|                    |                                                                   |           |         |            |                                                                         | Leuk        | 10-14 | B    | 158   | Knox   | NA                              | (NA/NA)                       | ALL, 0-14y, km; ALL, 0- |
|                    |                                                                   |           |         |            |                                                                         | Leuk        | 10-14 | B    | 158   | K-f    | NA                              | (NA/NA)                       | 14y, NN                 |
|                    |                                                                   |           |         |            |                                                                         | ALL         | 0-14  | B    | 647   | Knox   | 0                               | (0/2)                         |                         |
|                    |                                                                   |           |         |            |                                                                         | ALL         | 0-14  | B    | 647   | K-f    | 0                               | (0/2)                         |                         |
|                    |                                                                   |           |         |            |                                                                         | ALL         | 0-4   | B    | 359   | Knox   | 0                               | (0/2)                         |                         |
|                    |                                                                   |           |         |            |                                                                         | ALL         | 0-4   | B    | 359   | K-f    | 0                               | (0/2)                         |                         |
|                    |                                                                   |           |         |            |                                                                         | ALL         | 5-9   | B    | 187   | Knox   | NA                              | (NA/NA)                       |                         |
|                    |                                                                   |           |         |            |                                                                         | ALL         | 5-9   | B    | 187   | K-f    | NA                              | (NA/NA)                       |                         |
|                    |                                                                   |           |         |            |                                                                         | ALL         | 10-14 | B    | 101   | Knox   | NA                              | (NA/NA)                       |                         |
|                    |                                                                   |           |         |            |                                                                         | ALL         | 10-14 | B    | 101   | K-f    | NA                              | (NA/NA)                       |                         |
|                    |                                                                   |           |         |            |                                                                         | ALL         | 18-54 | B    | 292   | Knox   | 0                               | (0/2)                         |                         |
|                    |                                                                   |           |         |            |                                                                         | ALL         | 18-54 | B    | 292   | K-f    | 0                               | (0/2)                         |                         |
|                    |                                                                   |           |         |            |                                                                         | ANLL        | 0-14  | B    | 151   | Knox   | 0                               | (0/NA)                        |                         |
|                    |                                                                   |           |         |            |                                                                         | ANLL        | 0-14  | B    | 151   | K-f    | 0                               | (0/NA)                        |                         |
|                    |                                                                   |           |         |            |                                                                         | Leuk        | 0-14  | X    | 908   | Knox   | 0.5                             | (1/2)                         |                         |
|                    |                                                                   |           |         |            |                                                                         | Leuk        | 0-14  | X    | 908   | K-f    | 1                               | (2/2)                         |                         |
|                    |                                                                   |           |         |            |                                                                         | Leuk        | 0-4   | X    | 457   | Knox   | 0.5                             | (1/2)                         |                         |
|                    |                                                                   |           |         |            |                                                                         | Leuk        | 0-4   | X    | 457   | K-f    | 0.5                             | (1/2)                         |                         |
|                    |                                                                   |           |         |            |                                                                         | Leuk        | 5-9   | X    | 268   | Knox   | NA                              | (NA/NA)                       |                         |
|                    |                                                                   |           |         |            |                                                                         | Leuk        | 5-9   | X    | 268   | K-f    | NA                              | (NA/NA)                       |                         |
|                    |                                                                   |           |         |            |                                                                         | Leuk        | 10-14 | X    | 183   | Knox   | NA                              | (NA/NA)                       |                         |
|                    |                                                                   |           |         |            |                                                                         | Leuk        | 10-14 | X    | 183   | K-f    | NA                              | (NA/NA)                       |                         |
| ALL                | 0-14                                                              | X         | 739     | Knox       | 0                                                                       | (0/2)       |       |      |       |        |                                 |                               |                         |
| ALL                | 0-14                                                              | X         | 739     | K-f        | 1                                                                       | (2/2)       |       |      |       |        |                                 |                               |                         |
| ALL                | 0-4                                                               | X         | 399     | Knox       | 0                                                                       | (0/2)       |       |      |       |        |                                 |                               |                         |
| ALL                | 0-4                                                               | X         | 399     | K-f        | 0                                                                       | (0/2)       |       |      |       |        |                                 |                               |                         |
| ALL                | 5-9                                                               | X         | 216     | Knox       | NA                                                                      | (NA/NA)     |       |      |       |        |                                 |                               |                         |
| ALL                | 5-9                                                               | X         | 216     | K-f        | NA                                                                      | (NA/NA)     |       |      |       |        |                                 |                               |                         |
| ALL                | 10-14                                                             | X         | 124     | Knox       | NA                                                                      | (NA/NA)     |       |      |       |        |                                 |                               |                         |
| ALL                | 10-14                                                             | X         | 124     | K-f        | NA                                                                      | (NA/NA)     |       |      |       |        |                                 |                               |                         |

Table S1 continued

| Author, Year            | Study area | Period    | Quality | Resolution | Critical lags                                     | Cancer type | Age        | Time | Cases | Method | Results                         |                               |                                                                                                      |
|-------------------------|------------|-----------|---------|------------|---------------------------------------------------|-------------|------------|------|-------|--------|---------------------------------|-------------------------------|------------------------------------------------------------------------------------------------------|
|                         |            |           |         |            |                                                   |             |            |      |       |        | Rate of sig. Tests <sup>a</sup> | Significant test <sup>b</sup> |                                                                                                      |
| Gustafsson et al., 2000 | Sweden     | 1973-1996 | 2       | Areas      | s: same municipality<br>t: 1, 3, 6, 12, 24 months | ALL         | 18-54 mths | X    | 326   | Knox   | 0                               | (0/2)                         | B: ALL, 4-14y, same m., 1mth; ALL, 5-14y, same m., 1mth; ALL+unsp.Lk, 4-14, same m., 1mth<br>X: n.s. |
|                         |            |           |         |            |                                                   | ALL         | 18-54 mths | X    | 326   | K-f    | 0                               | (0/2)                         |                                                                                                      |
|                         |            |           |         |            |                                                   | ANLL        | 0-14       | X    | 169   | Knox   | 0                               | (0/NA)                        |                                                                                                      |
|                         |            |           |         |            |                                                   | ANLL        | 0-14       | X    | 169   | K-f    | 0                               | (0/NA)                        |                                                                                                      |
|                         |            |           |         |            |                                                   | ALL         | 0-14       | B    | 1020  | Knox   | 0                               | (0/5)                         |                                                                                                      |
|                         |            |           |         |            |                                                   | ALL         | 0-4        | B    | 661   | Knox   | 0                               | (0/5)                         |                                                                                                      |
|                         |            |           |         |            |                                                   | ALL         | 0-1        | B    | NA    | Knox   | 0                               | (0/5)                         |                                                                                                      |
|                         |            |           |         |            |                                                   | ALL         | 1-5        | B    | NA    | Knox   | 0                               | (0/5)                         |                                                                                                      |
|                         |            |           |         |            |                                                   | ALL         | 2-4        | B    | NA    | Knox   | 0                               | (0/5)                         |                                                                                                      |
|                         |            |           |         |            |                                                   | ALL         | 2-6        | B    | NA    | Knox   | 0                               | (0/5)                         |                                                                                                      |
|                         |            |           |         |            |                                                   | ALL         | 4-14       | B    | 503   | Knox   | 1                               | (1/1)                         |                                                                                                      |
|                         |            |           |         |            |                                                   | ALL         | 5-14       | B    | 359   | Knox   | 0.2                             | (1/5)                         |                                                                                                      |
|                         |            |           |         |            |                                                   | AL***       | 0-14       | B    | 1257  | Knox   | 0                               | (0/5)                         |                                                                                                      |
|                         |            |           |         |            |                                                   | AL***       | 0-4        | B    | NA    | Knox   | 0                               | (0/5)                         |                                                                                                      |
|                         |            |           |         |            |                                                   | AL***       | 0-1        | B    | NA    | Knox   | 0                               | (0/5)                         |                                                                                                      |
|                         |            |           |         |            |                                                   | AL***       | 1-5        | B    | NA    | Knox   | 0                               | (0/5)                         |                                                                                                      |
|                         |            |           |         |            |                                                   | AL***       | 2-4        | B    | NA    | Knox   | 0                               | (0/5)                         |                                                                                                      |
|                         |            |           |         |            |                                                   | AL***       | 2-6        | B    | NA    | Knox   | 0                               | (0/5)                         |                                                                                                      |
|                         |            |           |         |            |                                                   | AL***       | 4-14       | B    | NA    | Knox   | 0.2                             | (1/5)                         |                                                                                                      |
|                         |            |           |         |            |                                                   | AL***       | 5-14       | B    | NA    | Knox   | 0                               | (0/5)                         |                                                                                                      |
|                         |            |           |         |            |                                                   | ALL         | 0-14       | X    | NA    | Knox   | 0                               | (0/5)                         |                                                                                                      |
|                         |            |           |         |            |                                                   | ALL         | 0-4        | X    | NA    | Knox   | 0                               | (0/5)                         |                                                                                                      |
|                         |            |           |         |            |                                                   | ALL         | 0-1        | X    | NA    | Knox   | 0                               | (0/5)                         |                                                                                                      |
|                         |            |           |         |            |                                                   | ALL         | 1-5        | X    | NA    | Knox   | 0                               | (0/5)                         |                                                                                                      |
|                         |            |           |         |            |                                                   | ALL         | 2-4        | X    | NA    | Knox   | 0                               | (0/5)                         |                                                                                                      |
|                         |            |           |         |            |                                                   | ALL         | 2-6        | X    | NA    | Knox   | 0                               | (0/5)                         |                                                                                                      |
|                         |            |           |         |            |                                                   | ALL         | 4-14       | X    | NA    | Knox   | 0                               | (0/5)                         |                                                                                                      |
|                         |            |           |         |            |                                                   | ALL         | 5-14       | X    | NA    | Knox   | 0                               | (0/5)                         |                                                                                                      |
|                         |            |           |         |            |                                                   | AL***       | 0-14       | X    | NA    | Knox   | 0                               | (0/5)                         |                                                                                                      |
|                         |            |           |         |            |                                                   | AL***       | 0-4        | X    | NA    | Knox   | 0                               | (0/5)                         |                                                                                                      |
| AL***                   | 0-1        | X         | NA      | Knox       | 0                                                 | (0/5)       |            |      |       |        |                                 |                               |                                                                                                      |
| AL***                   | 1-5        | X         | NA      | Knox       | 0                                                 | (0/5)       |            |      |       |        |                                 |                               |                                                                                                      |
| AL***                   | 2-4        | X         | NA      | Knox       | 0                                                 | (0/5)       |            |      |       |        |                                 |                               |                                                                                                      |
| AL***                   | 2-6        | X         | NA      | Knox       | 0                                                 | (0/5)       |            |      |       |        |                                 |                               |                                                                                                      |
| AL***                   | 4-14       | X         | NA      | Knox       | 0                                                 | (0/5)       |            |      |       |        |                                 |                               |                                                                                                      |
| AL***                   | 5-14       | X         | NA      | Knox       | 0                                                 | (0/5)       |            |      |       |        |                                 |                               |                                                                                                      |

Table S1 continued

| Author, Year           | Study area                      | Period    | Quality | Resolution | Critical lags                                                                                                | Cancer type | Age   | Time | Cases | Method | Results                         |                               |                                                              |
|------------------------|---------------------------------|-----------|---------|------------|--------------------------------------------------------------------------------------------------------------|-------------|-------|------|-------|--------|---------------------------------|-------------------------------|--------------------------------------------------------------|
|                        |                                 |           |         |            |                                                                                                              |             |       |      |       |        | Rate of sig. Tests <sup>a</sup> | Significant test <sup>b</sup> |                                                              |
| McNally et al., 2002   | North West England, UK          | 1980-2001 | 3       | Postcodes  | s: Knox: 5 km, NN=b40/x41; K-f: 0.5-7.5 km, NN=33-47/34-48<br>t: 1 year                                      | ALL         | 0-14  | B    | 512   | Knox   | 0                               | (0/2)                         | B: K-f: Precursor B-cell ALL, 18-54mths, NN, 1y<br>X: n.s.   |
|                        |                                 |           |         |            |                                                                                                              | ALL         | 0-14  | B    | 512   | K-f    | 0                               | (0/2)                         |                                                              |
|                        |                                 |           |         |            |                                                                                                              | ALL         | 0-14  | X    | 512   | Knox   | 0                               | (0/2)                         |                                                              |
|                        |                                 |           |         |            |                                                                                                              | ALL         | 0-14  | X    | 512   | K-f    | 0                               | (0/2)                         |                                                              |
| Akhtar et al., 2005    | Karachi, Pakistan               | 1995-2002 | 1       | Geocodes   | s: 1, 1.5, 2, ..., 7 km<br>t: 1, 2, 3, 4, 5, 6 months                                                        | Leuk        | 0-14  | X    | 142   | Knox   | 0.013                           | (1/78)                        | Leuk, 0-14y, 6km, 3mths                                      |
| McNally et al., 2006   | Great Britain                   | 1969-1993 | 3       | Postcodes  | s: K-f: NN=19-33, Knox: not specified<br>t: K-f: 0.1, 0.2, ..., 1.5 years; Knox: not specified               | Leuk        | 0-14  | X    | 10727 | K-f    | 1                               | (1/1)                         | K-f: Leuk, 0-14y; ALL, 0-14y; ALL, 1-4y                      |
|                        |                                 |           |         |            |                                                                                                              | Leuk        | 1-4   | X    | 5092  | K-f    | 0                               | (0/1)                         |                                                              |
|                        |                                 |           |         |            |                                                                                                              | Leuk        | 5-14  | X    | 5087  | K-f    | 0                               | (0/1)                         |                                                              |
|                        |                                 |           |         |            |                                                                                                              | ALL         | 0-14  | X    | 8439  | K-f    | 1                               | (1/1)                         |                                                              |
|                        |                                 |           |         |            |                                                                                                              | ALL         | 1-4   | X    | 4343  | K-f    | 1                               | (1/1)                         |                                                              |
|                        |                                 |           |         |            |                                                                                                              | ALL         | 5-14  | X    | 3810  | K-f    | 0                               | (0/1)                         |                                                              |
|                        |                                 |           |         |            |                                                                                                              | ANLL        | 0-14  | X    | 1736  | K-f    | 0                               | (0/1)                         |                                                              |
| Bellec et al., 2006    | France                          | 1990-2000 | 2       | Areas      | s: Knox: 0, 5, 10, 15, 20, 30, 50 km; K: 10% of population<br>t: Knox: 1, 3, 6, 9, 12 months; K: 50% of time | AL          | 0-14  | X    | 4873  | Knox   | 0                               | (0/35)                        | Knox: AL, 0-4y, 30km, 3mths; AL, 10-14y, 0km, 6mths; K: n.s. |
|                        |                                 |           |         |            |                                                                                                              | AL          | 0-4   | X    | 2458  | Knox   | 0.029                           | (1/35)                        |                                                              |
|                        |                                 |           |         |            |                                                                                                              | AL          | 5-9   | X    | 1427  | Knox   | 0                               | (0/35)                        |                                                              |
|                        |                                 |           |         |            |                                                                                                              | AL          | 10-14 | X    | 988   | Knox   | 0.029                           | (1/35)                        |                                                              |
|                        |                                 |           |         |            |                                                                                                              | AL          | 0-14  | X    | 4873  | Scan   | 0                               | (0/1)                         |                                                              |
|                        |                                 |           |         |            |                                                                                                              | AL          | 0-4   | X    | 2458  | Scan   | 0                               | (0/1)                         |                                                              |
|                        |                                 |           |         |            |                                                                                                              | AL          | 5-9   | X    | 1427  | Scan   | 0                               | (0/1)                         |                                                              |
|                        |                                 |           |         |            |                                                                                                              | AL          | 10-14 | X    | 988   | Scan   | 0                               | (0/1)                         |                                                              |
| COMARE, 2006           | England, Scotland and Wales, UK | 1969-1993 | 3       | Postcodes  | s: 0.5, 1, 1.5, ..., 7.5 km<br>t: 0.1, 0.2, ..., 1.5 years                                                   | Leuk        | 0-14  | X    | 10737 | K-f    | 1                               | (1/1)                         | Leuk, 0-14y; ALL, 0-14y; ALL, 1-4y                           |
|                        |                                 |           |         |            |                                                                                                              | Leuk        | 1-4   | X    | 5094  | K-f    | 0                               | (0/1)                         |                                                              |
|                        |                                 |           |         |            |                                                                                                              | Leuk        | 5-14  | X    | 5092  | K-f    | 0                               | (0/1)                         |                                                              |
|                        |                                 |           |         |            |                                                                                                              | ALL         | 0-14  | X    | 8687  | K-f    | 1                               | (1/1)                         |                                                              |
|                        |                                 |           |         |            |                                                                                                              | ALL         | 1-4   | X    | 4441  | K-f    | 1                               | (1/1)                         |                                                              |
|                        |                                 |           |         |            |                                                                                                              | ALL         | 5-14  | X    | 3906  | K-f    | 0                               | (0/1)                         |                                                              |
| Kearney, 2008          | Florida, USA                    | 1990-1999 | 3       | Areas      | s: Census Tracts<br>t: 1-10 years                                                                            | Leuk        | 0-19  | X    | 1125  | Scan   | 1                               | (1/1)                         | Leuk, 0-19y                                                  |
| McNally et al., 2009   | Great Britain                   | 1969-1993 | 3       | Postcodes  | s: K-f: NN=18-32, Knox: NN=25<br>t: K-f: 0.1, 0.2, ..., 1.5 years; Knox: 1 year                              | Leuk        | 0-14  | B    | 9763  | K-f    | 0                               | (0/1)                         | n.s.                                                         |
|                        |                                 |           |         |            |                                                                                                              | Leuk        | 1-4   | B    | 4850  | K-f    | 0                               | (0/1)                         |                                                              |
|                        |                                 |           |         |            |                                                                                                              | Leuk        | 5-14  | B    | 4365  | K-f    | 0                               | (0/1)                         |                                                              |
|                        |                                 |           |         |            |                                                                                                              | ALL         | 0-14  | B    | 7759  | K-f    | 0                               | (0/1)                         |                                                              |
|                        |                                 |           |         |            |                                                                                                              | ALL         | 1-4   | B    | 4140  | K-f    | 0                               | (0/1)                         |                                                              |
|                        |                                 |           |         |            |                                                                                                              | ALL         | 5-14  | B    | 3335  | K-f    | 0                               | (0/1)                         |                                                              |
|                        |                                 |           |         |            |                                                                                                              | ANLL        | 0-14  | B    | 1528  | K-f    | 0                               | (0/1)                         |                                                              |
| Schmiedel et al., 2010 | Germany                         | 1987-2007 | 2       | Areas      | s: municipalities<br>t: individual years                                                                     | Leuk        | 0-14  | X    | 11946 | Scan   | 0                               | (0/1)                         | n.s.                                                         |
|                        |                                 |           |         |            |                                                                                                              | Leuk        | 0-4   | X    | 6103  | Scan   | 0                               | (0/1)                         |                                                              |
|                        |                                 |           |         |            |                                                                                                              | Leuk        | 5-9   | X    | 3407  | Scan   | 0                               | (0/1)                         |                                                              |

Table S1 continued

| Author, Year               | Study area    | Period    | Quality | Resolution | Critical lags                                           | Cancer type | Age   | Time | Cases | Method | Results                         |                               |                      |
|----------------------------|---------------|-----------|---------|------------|---------------------------------------------------------|-------------|-------|------|-------|--------|---------------------------------|-------------------------------|----------------------|
|                            |               |           |         |            |                                                         |             |       |      |       |        | Rate of sig. Tests <sup>a</sup> | Significant test <sup>b</sup> |                      |
| Amin et al., 2010          | Florida, USA  | 2000-2007 | 3       | Areas      | s: not specified<br>t: individual years (not specified) | Leuk        | 10-14 | X    | 2436  | Scan   | 0                               | (0/1)                         |                      |
|                            |               |           |         |            |                                                         | Leuk        | 0-19  | X    | 1254  | Scan   | 1                               | (1/1)                         | Leuk, 0-19y, 00-02   |
| Demoury et al., 2012       | France        | 1990-2006 | 2       | Areas      | s: 100 living zones<br>t: individual years              | AL          | 0-14  | X    | 7675  | Scan   | 0                               | (0/3)                         | n.s.                 |
|                            |               |           |         |            |                                                         | AML         | 0-14  | X    | 1276  | Scan   | 0                               | (0/3)                         |                      |
|                            |               |           |         |            |                                                         | ALL         | 0-14  | X    | 6269  | Scan   | 0                               | (0/3)                         |                      |
|                            |               |           |         |            |                                                         | ALL         | 1-4   | X    | 3013  | Scan   | 0                               | (0/3)                         |                      |
| Ortega-Garcia et al., 2015 | Murcia, Spain | 1998-2013 | 2       | Areas      | s: census tracts<br>t: months                           | Leuk        | 0-14  | X    | 39    | Scan   | 0                               | (0/1)                         | n.s.                 |
| Kreis et al., 2016         | Switzerland   | 1985-2010 | 4       | Geocodes   | s: 0.5, 1, 2, 5, 10 km<br>t: 6, 12, 18, 24 months       | Leuk        | 0-15  | B    | 1052  | Knox   | 1                               | (1/1)                         | B: Leuk, 0-15y, 1km, |
|                            |               |           |         |            |                                                         | Leuk        | 0-4   | B    | 631   | Knox   | 0                               | (0/1)                         | 2y; ALL, 0-15y, 1km, |
|                            |               |           |         |            |                                                         | Leuk        | 5-15  | B    | 421   | Knox   | 0                               | (0/1)                         | 2y                   |
|                            |               |           |         |            |                                                         | Leuk        | 0-15  | X    | 1485  | Knox   | 0                               | (0/1)                         | X: n.s.              |
|                            |               |           |         |            |                                                         | Leuk        | 0-4   | X    | 753   | Knox   | 0                               | (0/1)                         |                      |
|                            |               |           |         |            |                                                         | Leuk        | 5-15  | X    | 732   | Knox   | 0                               | (0/1)                         |                      |
|                            |               |           |         |            |                                                         | ALL         | 0-15  | B    | 852   | Knox   | 0                               | (0/1)                         |                      |
|                            |               |           |         |            |                                                         | ALL         | 0-4   | B    | 519   | Knox   | 0                               | (0/1)                         |                      |
|                            |               |           |         |            |                                                         | ALL         | 5-15  | B    | 333   | Knox   | 0                               | (0/1)                         |                      |
|                            |               |           |         |            |                                                         | ALL         | 0-15  | X    | 1185  | Knox   | 0                               | (0/1)                         |                      |
|                            |               |           |         |            |                                                         | ALL         | 0-4   | X    | 628   | Knox   | 0                               | (0/1)                         |                      |
|                            |               |           |         |            |                                                         | ALL         | 5-15  | X    | 557   | Knox   | 0                               | (0/1)                         |                      |

<sup>a</sup>Proportion of significant space-time clustering tests per analysis group (number of clustering tests significant at 5% alpha-level/total number of clustering tests performed).

<sup>b</sup>Characteristics of (most) significant space-time clustering test, specifying (if applicable): time frame of birth B: or diagnosis X: clustering test: diagnostic group, age range, spatial lag, temporal lag, sub-area, sub-period. Results are not adjusted for multiple testing.

**Critical lags:** *s* spatial lag, *t* temporal lag, *NN* nearest neighbors, *M* Mantel test, *K-f* K-functions, *K* Kulldorff's scan statistic; **Cancer type:** *Leuk* Leukaemia, *AL* acute leukaemia, *AL\** AL and chronic granulocytic leukaemia, *AL\*\** acute granulocytic and monocytic leukaemia, *ALL* acute lymphoblastic leukemia, *AL\*\*\** ALL and acute unspecified leukaemia, *LL* Lymphoid leukemia, *LL\** lymphocytic and unspecified leukaemia, *ML* myeloid leukaemia, *AML* acute myeloid leukaemia; **Time:** *B* date of birth, *X* date of diagnosis; **Method:** *E-M-M* Ederer-Myers-Mantel, *K-f* K-functions, *K statistic* combinatorial test invented by the authors, *Scan* Kulldorff's scan statistic; **Results:** *NA* not applicable, *n.s.* not significant, *M* Mantel test, *K-f* K-functions, *K* Kulldorff's scan statistic, *m* mile(s), *d* days, *mth(s)* month(s), *y* year(s).

<sup>1</sup>Not counting Knox analyses used for descriptive purposes rather than significance testing purposes

<sup>2</sup>Two tests performed for two sub-periods 1956-67 and 1957-68

<sup>3</sup>1952-1959

<sup>4</sup>1961-1964

<sup>5</sup>Summary statistic for whole period used

<sup>6</sup>All diagnostic groups (not only leukaemias)

<sup>7</sup>Inside central Britain

<sup>8</sup>Outside central Britain

<sup>9</sup>Excluded from quantitative synthesis as space-time clustering analyses were performed on census areas that were pre-identified as containing case excesses

<sup>10</sup>1984-1988

<sup>11</sup>1989-1993
