# Supplementary material for: Space–time clustering of childhood cancers: a systematic review and pooled analysis
Source: Springer Nature journal article supplement (doi:10.1007/s10654-018-0456-y), 2018-11-16
Supplement: MOESM4 [file 16275942]

**Table S2** Space-time clustering studies of lymphoma

| Author, Year          | Study Area                         | Period    | Quality | Resolution | Critical lags                                                                                                            | Type of cancer | Age               | Time | Cases | Method              | Results                         |                               |                                                                                                                             |
|-----------------------|------------------------------------|-----------|---------|------------|--------------------------------------------------------------------------------------------------------------------------|----------------|-------------------|------|-------|---------------------|---------------------------------|-------------------------------|-----------------------------------------------------------------------------------------------------------------------------|
|                       |                                    |           |         |            |                                                                                                                          |                |                   |      |       |                     | Rate of sig. Tests <sup>a</sup> | Significant test <sup>b</sup> |                                                                                                                             |
| Pinkel et al., 1963   | Buffalo Area, NY, USA              | 1943-1956 | 2       | Postcodes  | s: 1/8, 2/8, ..., 1 mile<br>t: not specified                                                                             | HL             | 0-15              | X    | 206   | Average ridit       | NA                              | (NA/NA) <sup>1</sup>          |                                                                                                                             |
| Ederer et al., 1965   | State of Connecticut, USA          | 1945-1959 | 2       | Areas      | s: same town<br>t: 1, 2 years                                                                                            | Lymphoma       | 0-14              | X    | 448   | E-M-M               | 0                               | (0/2)                         | n.s.                                                                                                                        |
| Pike et al., 1967     | West Nile District, Uganda         | 1961-1965 | 1       | Geocodes   | s: 2, 5, 10, 20, 40 km<br>t: 30, 60, 90, 120, 180, 360 days                                                              | BL             | 0-12              | X    | 36    | Knox                | 0.633                           | (19/30)                       | BL, 0-12y, 40km, 180d                                                                                                       |
|                       |                                    |           |         |            |                                                                                                                          | BL             | 0-12              | X    | 36    | David & Barton 1966 | NA                              | (NA/NA) <sup>2</sup>          |                                                                                                                             |
| Glass et al., 1968    | Los Angeles County, USA            | 1960-1964 | 1       | Geocodes   | s: same census region<br>t: 1 year                                                                                       | Lymphoma       | 0-14              | X    | 645   | E-M-M               | NA                              | (NA/NA) <sup>1</sup>          |                                                                                                                             |
| Williams et al., 1969 | West Nile District, Uganda         | 1966-1967 | 1       | Geocodes   | s: 1, 2, 3, 4, 5, 6, 7, 8, 9, 10 km<br>t: 2 years                                                                        | BL             | 0-10              | X    | 29    | Knox                | 0.6                             | (6/10)                        | BL, 0-10y, 9km, 2y                                                                                                          |
| Fraumeni et al., 1969 | United States of America           | 1960-1964 | 0       | Areas      | s: same region; same division; same state<br>t: 1 year                                                                   | HL             | 0-14              | X    | 359   | E-M-M               | 0                               | (0/3) <sup>3</sup>            | n.s.                                                                                                                        |
| Brubaker et al., 1973 | North Mara District, Tanzania      | 1964-1970 | 2       | Geocodes   | s: 1, 2, 4, 8, 16, 32 km<br>t: 0.25, 0.5, 1, 2, 3, 4, 6 months                                                           | BL             | 0-14              | X    | 36    | Knox                | 0                               | (0/42)                        | n.s.                                                                                                                        |
| Morrow et al., 1976   | Mengo District, Uganda             | 1959-1968 | 2       | Geocodes   | s: 2.5, 5, 10, 20, 40 km<br>t: Knox: 30, 60, 90, 12, 180, 360 days; Barton: 5, 10, 15, 20, 25, 45, 60, 75, 120, 180 days | BL             | 0-19 <sup>4</sup> | X    | 113   | Knox                | 0                               | (0/30)                        | n.s.                                                                                                                        |
|                       |                                    |           |         |            |                                                                                                                          | BL             | 0-19 <sup>4</sup> | X    | 113   | Barton 1965         | 0                               | (0/50)                        |                                                                                                                             |
| Morrow et al., 1977   | Lango and Acholi districts, Uganda | 1963-1968 | 2       | Geocodes   | s: 2.5, 5, 10, 20, 40 km<br>t: 30, 60, 90, 120, 180, 360 days                                                            | BL             | 0-14+             | X    | 85    | Knox                | 0                               | (0/42)                        | n.s.                                                                                                                        |
| Williams et al., 1978 | West Nile District, Uganda         | 1961-1975 | 2       | Geocodes   | s: 2.5, 5, 10, 20, 40 km<br>t: 1, 2, 3, 4, 6, 12 months                                                                  | BL             | 0-15+             | X    | 35    | Knox                | 0.633                           | (19/30) <sup>5</sup>          | BL, 0-15y, 40km, 4mths, 61-65; BL, 0-15y, 10km, 12mths, 66-70, BL, 0-15y, 10km, 6mths, 71-75; BL, 0-15y, 10km, 6mths, 72-73 |
|                       |                                    |           |         |            |                                                                                                                          | BL             | 0-15+             | X    | 72    | Knox                | 0.067                           | (2/30) <sup>6</sup>           |                                                                                                                             |
|                       |                                    |           |         |            |                                                                                                                          | BL             | 0-15+             | X    | 81    | Knox                | 0.1                             | (3/30) <sup>7</sup>           |                                                                                                                             |
| Biggar et al., 1979   | Ghana                              | 1970-1975 | 0       | Areas      | s: 40km<br>t: 3, 6, 9, 12, 18, 24, 36 months                                                                             | BL, Non-BL     | NA                | X    | 339   | Knox (modified)     | 0.286                           | (2/7)                         | BL, na, 40km, 3mths                                                                                                         |

Table S2 continued

| Author, Year               | Study Area                              | Period    | Quality | Resolution | Critical lags                                                                                                                              | Type of cancer              | Age  | Time | Cases              | Method       | Results                         |                               |                                                                                                                                      |
|----------------------------|-----------------------------------------|-----------|---------|------------|--------------------------------------------------------------------------------------------------------------------------------------------|-----------------------------|------|------|--------------------|--------------|---------------------------------|-------------------------------|--------------------------------------------------------------------------------------------------------------------------------------|
|                            |                                         |           |         |            |                                                                                                                                            |                             |      |      |                    |              | Rate of sig. Tests <sup>a</sup> | Significant test <sup>b</sup> |                                                                                                                                      |
| Siemiatycki et al., 1980   | North Mara, Tanzania; West Nile, Uganda | 1961-1977 | 1       | Geocodes   | s: Knox: 5, 20 km; M: 24 combinations of time and space functions<br>t: Knox: 4, 12 months; M: 24 combinations of time and space functions | BL                          | 0-15 | X    | 278                | Knox, Mantel | 0                               | (0/24) <sup>8</sup>           | BL, 0-15y, 20km, 12mths, West Nile, 61-65; North Mara n.s.                                                                           |
|                            |                                         |           |         |            |                                                                                                                                            | BL                          | 0-15 | X    | 278                | Knox, Mantel | 0                               | (0/24) <sup>9</sup>           |                                                                                                                                      |
|                            |                                         |           |         |            |                                                                                                                                            | BL                          | 0-15 | X    | 278                | Knox, Mantel | 0.458                           | (11/24) <sup>10</sup>         |                                                                                                                                      |
|                            |                                         |           |         |            |                                                                                                                                            | BL                          | 0-15 | X    | 278                | Knox, Mantel | 0                               | (0/24) <sup>11</sup>          |                                                                                                                                      |
|                            |                                         |           |         |            |                                                                                                                                            | BL                          | 0-15 | X    | 278                | Knox, Mantel | 0                               | (0/24) <sup>12</sup>          |                                                                                                                                      |
| Mangoud et al., 1985       | Greater Manchester, UK                  | 1962-1976 | 2       | Postcodes  | s: 0.5, 1, 2, 4, 8, 16 km<br>t: 1, 2, 4, 8, 12, 24, 36, 48, 60, 72, 84 months                                                              | HL                          | 0-14 | X    | 39                 | Knox         | 0.197                           | (13/66)                       | HL, 0-14y, 1km, 1mth                                                                                                                 |
| Gilman et al., 1991        | England, Scotland and Wales, UK         | 1966-1983 | 3       | Postcodes  | s: 1, 2, 3, 4, 5, 10, 20 km<br>t: 0, 1, ..., 9, 12, 18, 24, 48 months                                                                      | NHL                         | 0-14 | X    | 1251               | Knox         | 0.071                           | (6/84) <sup>13</sup>          | NHL, 0-14, 3km, 0mths;<br>NH+unsp.Lymph, 0-14y, 3km, 0mths;<br>NH+unsp.Lymph, 0-4y, 2km, 0mths;<br>NH+unsp.Lymph, 5-14y, 5km, 24mths |
|                            |                                         |           |         |            |                                                                                                                                            | NH and unspecified Lymphoma | 0-14 | X    | 1363               | Knox         | 0.06                            | (5/84) <sup>13</sup>          |                                                                                                                                      |
|                            |                                         |           |         |            |                                                                                                                                            | NH and unspecified Lymphoma | 0-4  | X    | 332                | Knox         | 0.024                           | (2/84) <sup>13</sup>          |                                                                                                                                      |
|                            |                                         |           |         |            |                                                                                                                                            | NH and unspecified Lymphoma | 5-14 | X    | 1031               | Knox         | 0.048                           | (4/84) <sup>13</sup>          |                                                                                                                                      |
| Knox et al., 1992          | England, Wales and Scotland, UK         | 1966-1983 | 3       | Postcodes  | s: 0.5, 1, 1.5, 2, 5, 20, 100 km<br>t: 0.5, 1, 2, 4, 12 months                                                                             | Leuk+Lymph                  | 0-14 | X    | 8888               | Knox         | 0.143                           | (6/42)                        | Leuk&Lymph, 0-14y, 0.5km, 2mths;<br>Leuk&Lymph, 4-7y, 1.5km, 1mth                                                                    |
|                            |                                         |           |         |            |                                                                                                                                            | Leuk+Lymph                  | 0-3  | X    | NA                 | Knox         | 0                               | (0/42)                        |                                                                                                                                      |
|                            |                                         |           |         |            |                                                                                                                                            | Leuk+Lymph                  | 4-7  | X    | NA                 | Knox         | 0.095                           | (4/42)                        |                                                                                                                                      |
|                            |                                         |           |         |            |                                                                                                                                            | Leuk+Lymph                  | 8-13 | X    | NA                 | Knox         | 0                               | (0/42)                        |                                                                                                                                      |
| Van Den Bosch et al., 1993 | Malawi                                  | 1987-1989 | 1       | Geocodes   | s: 2.5, 5, 10, 15, 20 km<br>t: 0.33, 1, 2, 3, 4, 6 months                                                                                  | BL                          | 0-22 | X    | 146                | Knox         | 0.033                           | (1/30)                        | BL, 0-22y, 2.5km, 2mths; BL, 8-22y, 5km, 3mths                                                                                       |
|                            |                                         |           |         |            |                                                                                                                                            | BL                          | 8-22 | X    | 72                 | Knox         | 0.067                           | (2/30)                        |                                                                                                                                      |
| Schneider et al., 1993     | New Jersey, USA                         | 1979-1985 | 2       | Areas      | s: same minor civil division (town)<br>t: 7, 14 months                                                                                     | HL                          | 0-14 | X    | 5500 <sup>14</sup> | E-M-M        | 0.5                             | (1/2)                         | HL, 0-14y, 7mths;<br>NHL, 0-14y, 7mths                                                                                               |
|                            |                                         |           |         |            |                                                                                                                                            | NHL                         | 0-14 | X    | 5500 <sup>14</sup> | E-M-M        | 0.5                             | (1/2)                         |                                                                                                                                      |

Table S2 continued

| Author, Year            | Study Area                      | Period    | Quality | Resolution | Critical lags                                                            | Type of cancer | Age  | Time | Cases | Method | Results                         |                               |                                                                                                                                                                                                                                        |
|-------------------------|---------------------------------|-----------|---------|------------|--------------------------------------------------------------------------|----------------|------|------|-------|--------|---------------------------------|-------------------------------|----------------------------------------------------------------------------------------------------------------------------------------------------------------------------------------------------------------------------------------|
|                         |                                 |           |         |            |                                                                          |                |      |      |       |        | Rate of sig. Tests <sup>a</sup> | Significant test <sup>b</sup> |                                                                                                                                                                                                                                        |
| Gilman et al., 1995     | England, Wales and Scotland, UK | 1953-1980 | 3       | Postcodes  | s: 1, 2, 3, 4, 5, 10, 20 km<br>t: 0, 1, ..., 6, 9, 12, 18, 24, 48 months | Leuk+Lymph     | 0-15 | B    | 1435  | Knox   | 0.022                           | (1/45) <sup>15</sup>          | B: Leuk+Lymph, 0-15y, 53-64, central Britain, 2km, 1mth, Leuk+Lymph, 0-15y, 53-64, outside central Britain, 1km, 3mths<br>X: Leuk+Lymph, 0-15y, central Britain, 2km, 2mths, Leuk+Lymph, 0-15y, outside central Britain, 4km, same mth |
|                         |                                 |           |         |            |                                                                          | Leuk+Lymph     | 0-15 | B    | 2478  | Knox   | 0.044                           | (2/45) <sup>16</sup>          |                                                                                                                                                                                                                                        |
|                         |                                 |           |         |            |                                                                          | Leuk+Lymph     | 0-15 | X    | 3862  | Knox   | 0.067                           | (3/45) <sup>15</sup>          |                                                                                                                                                                                                                                        |
|                         |                                 |           |         |            |                                                                          | Leuk+Lymph     | 0-15 | X    | 6511  | Knox   | 0.178                           | (8/45) <sup>16</sup>          |                                                                                                                                                                                                                                        |
| Gilman et al., 1999     | England and Wales (approx. 40%) | 1984-1993 | 3       | Geocodes   | s: 1, 2, 3, 4, 5 km<br>t: 0, 1, ..., 6, 9, 12, 18 months                 | HL             | 0-14 | X    | 47    | Knox   | 0                               | (0/1) <sup>17</sup>           | HL, 0-14y, 2km, same mth, 89-93                                                                                                                                                                                                        |
|                         |                                 |           |         |            |                                                                          | HL             | 0-14 | X    | 34    | Knox   | 0                               | (0/1) <sup>18</sup>           |                                                                                                                                                                                                                                        |
| Gustafsson et al., 2000 | Sweden                          | 1973-1996 | 2       | Areas      | s: same municipality<br>t: 1, 3, 6, 12, 24 months                        | ALL + NHL      | 0-14 | B    | 1313  | Knox   | 0                               | (0/5)                         | B: n.s.                                                                                                                                                                                                                                |
|                         |                                 |           |         |            |                                                                          | ALL + NHL      | 0-4  | B    | 791   | Knox   | 0                               | (0/5)                         | X: n.s.                                                                                                                                                                                                                                |
|                         |                                 |           |         |            |                                                                          | ALL + NHL      | 0-1  | B    | NA    | Knox   | 0                               | (0/5)                         |                                                                                                                                                                                                                                        |
|                         |                                 |           |         |            |                                                                          | ALL + NHL      | 1-5  | B    | NA    | Knox   | 0                               | (0/5)                         |                                                                                                                                                                                                                                        |
|                         |                                 |           |         |            |                                                                          | ALL + NHL      | 2-4  | B    | NA    | Knox   | 0                               | (0/5)                         |                                                                                                                                                                                                                                        |
|                         |                                 |           |         |            |                                                                          | ALL + NHL      | 2-6  | B    | NA    | Knox   | 0                               | (0/5)                         |                                                                                                                                                                                                                                        |
|                         |                                 |           |         |            |                                                                          | ALL + NHL      | 4-14 | B    | 688   | Knox   | 0                               | (0/5)                         |                                                                                                                                                                                                                                        |
|                         |                                 |           |         |            |                                                                          | ALL + NHL      | 5-14 | B    | 522   | Knox   | 0                               | (0/5)                         |                                                                                                                                                                                                                                        |
|                         |                                 |           |         |            |                                                                          | ALL + NHL      | 0-14 | X    | NA    | Knox   | 0                               | (0/5)                         |                                                                                                                                                                                                                                        |
|                         |                                 |           |         |            |                                                                          | ALL + NHL      | 0-4  | X    | NA    | Knox   | 0                               | (0/5)                         |                                                                                                                                                                                                                                        |
|                         |                                 |           |         |            |                                                                          | ALL + NHL      | 0-1  | X    | NA    | Knox   | 0                               | (0/5)                         |                                                                                                                                                                                                                                        |
|                         |                                 |           |         |            |                                                                          | ALL + NHL      | 1-5  | X    | NA    | Knox   | 0                               | (0/5)                         |                                                                                                                                                                                                                                        |
|                         |                                 |           |         |            |                                                                          | ALL + NHL      | 2-4  | X    | NA    | Knox   | 0                               | (0/5)                         |                                                                                                                                                                                                                                        |
|                         |                                 |           |         |            |                                                                          | ALL + NHL      | 2-6  | X    | NA    | Knox   | 0                               | (0/5)                         |                                                                                                                                                                                                                                        |
|                         |                                 |           |         |            |                                                                          | ALL + NHL      | 4-14 | X    | NA    | Knox   | 0                               | (0/5)                         |                                                                                                                                                                                                                                        |
| ALL + NHL               | 5-14                            | X         | NA      | Knox       | 0                                                                        | (0/5)          |      |      |       |        |                                 |                               |                                                                                                                                                                                                                                        |

Table S2 continued

| Author, Year               | Study Area                      | Period    | Quality | Resolution | Critical lags                                                                               | Type of cancer              | Age  | Time | Cases | Method | Results                         |                               |                                     |
|----------------------------|---------------------------------|-----------|---------|------------|---------------------------------------------------------------------------------------------|-----------------------------|------|------|-------|--------|---------------------------------|-------------------------------|-------------------------------------|
|                            |                                 |           |         |            |                                                                                             |                             |      |      |       |        | Rate of sig. Tests <sup>a</sup> | Significant test <sup>b</sup> |                                     |
| McNally et al., 2004       | North West England, UK          | 1954-2001 | 3       | Postcodes  | s: Knox: 5 km, NN=b11/x11; K-f: 0.5-7.5 km, NN=4-18/4-18 t: Knox: 1 year; K-f: 1-15 months  | Lymphoma                    | 0-14 | B    | 414   | K-f    | 0                               | (0/2)                         | B: n.s.                             |
|                            |                                 |           |         |            |                                                                                             | HL                          | 0-14 | B    | 188   | K-f    | 0                               | (0/2)                         | X: n.s.                             |
|                            |                                 |           |         |            |                                                                                             | NHL                         | 0-14 | B    | 211   | K-f    | 0                               | (0/2)                         |                                     |
|                            |                                 |           |         |            |                                                                                             | HL+NHL                      | 0-14 | B    | 399   | K-f    | 0                               | (0/2)                         |                                     |
|                            |                                 |           |         |            |                                                                                             | Lymphoma                    | 0-14 | B    | 414   | Knox   | 0                               | (0/2)                         |                                     |
|                            |                                 |           |         |            |                                                                                             | HL                          | 0-14 | B    | 188   | Knox   | 0                               | (0/2)                         |                                     |
|                            |                                 |           |         |            |                                                                                             | NHL                         | 0-14 | B    | 211   | Knox   | 0                               | (0/2)                         |                                     |
|                            |                                 |           |         |            |                                                                                             | HL+NHL                      | 0-14 | B    | 399   | Knox   | 0                               | (0/2)                         |                                     |
|                            |                                 |           |         |            |                                                                                             | Lymphoma                    | 0-14 | X    | 414   | K-f    | 0                               | (0/2)                         |                                     |
|                            |                                 |           |         |            |                                                                                             | HL                          | 0-14 | X    | 188   | K-f    | 0                               | (0/2)                         |                                     |
|                            |                                 |           |         |            |                                                                                             | NHL                         | 0-14 | X    | 211   | K-f    | 0                               | (0/2)                         |                                     |
|                            |                                 |           |         |            |                                                                                             | HL+NHL                      | 0-14 | X    | 399   | K-f    | 0                               | (0/2)                         |                                     |
|                            |                                 |           |         |            |                                                                                             | Lymphoma                    | 0-14 | X    | 414   | Knox   | 0                               | (0/2)                         |                                     |
|                            |                                 |           |         |            |                                                                                             | HL                          | 0-14 | X    | 188   | Knox   | 0                               | (0/2)                         |                                     |
| NHL                        | 0-14                            | X         | 211     | Knox       | 0                                                                                           | (0/2)                       |      |      |       |        |                                 |                               |                                     |
| HL+NHL                     | 0-14                            | X         | 399     | Knox       | 0                                                                                           | (0/2)                       |      |      |       |        |                                 |                               |                                     |
| McNally et al., 2006       | Great Britain                   | 1969-1993 | 3       | Postcodes  | s: K-f: NN=19-33, Knox: not specified t: K-f: 0.1, 0.2, ..., 1.5 years; Knox: not specified | Lymphoma                    | 0-14 | X    | 3306  | K-f    | 0                               | (0/1)                         | n.s.                                |
|                            |                                 |           |         |            |                                                                                             | HL                          | 0-14 | X    | 1364  | K-f    | 0                               | (0/1)                         |                                     |
|                            |                                 |           |         |            |                                                                                             | HL                          | 0-9  | X    | 487   | K-f    | 0                               | (0/1)                         |                                     |
|                            |                                 |           |         |            |                                                                                             | NHL                         | 0-14 | X    | 1678  | K-f    | 0                               | (0/1)                         |                                     |
|                            |                                 |           |         |            |                                                                                             | NHL                         | 0-9  | X    | 1027  | K-f    | 0                               | (0/1)                         |                                     |
| COMARE, 2006               | England, Scotland and Wales, UK | 1969-1993 | 3       | Postcodes  | s: 0.5, 1, 1.5, ..., 7.5 km t: 0.1, 0.2, ..., 1.5 years                                     | HL                          | 0-14 | X    | 877   | K-f    | 0                               | (0/1)                         | n.s.                                |
|                            |                                 |           |         |            |                                                                                             | HL                          | 0-9  | X    | 487   | K-f    | 0                               | (0/1)                         |                                     |
|                            |                                 |           |         |            |                                                                                             | NHL                         | 0-14 | X    | 1678  | K-f    | 0                               | (0/1)                         |                                     |
|                            |                                 |           |         |            |                                                                                             | NHL                         | 0-9  | X    | 1027  | K-f    | 0                               | (0/1)                         |                                     |
| Kearney, 2008              | Florida, USA                    | 1990-1999 | 3       | Areas      | s: Census Tracts t: 1-10 years                                                              | Lymphoma (not including HL) | 0-19 | X    | 126   | Scan   | 1                               | (1/1)                         | Lymphoma, 0-19y                     |
| McNally et al., 2009       | Great Britain                   | 1969-1993 | 3       | Postcodes  | s: K-f: NN=18-32, Knox: NN=25 t: K-f: 0.1, 0.2, ..., 1.5 years; Knox: 1 year                | Lymphoma                    | 0-14 | B    | 2939  | K-f    | 0                               | (0/1)                         | HL, 0-14y                           |
|                            |                                 |           |         |            |                                                                                             | HL                          | 0-14 | B    | 1226  | K-f    | 1                               | (1/1)                         |                                     |
|                            |                                 |           |         |            |                                                                                             | HL                          | 0-9  | B    | 444   | K-f    | 0                               | (0/1)                         |                                     |
|                            |                                 |           |         |            |                                                                                             | NHL                         | 0-14 | B    | 1485  | K-f    | 0                               | (0/1)                         |                                     |
|                            |                                 |           |         |            |                                                                                             | NHL                         | 0-9  | B    | 937   | K-f    | 0                               | (0/1)                         |                                     |
| Amin et al., 2010          | Florida, USA                    | 2000-2007 | 3       | Areas      | s: not specified t: individual years (not specified)                                        | Lymphoma                    | 0-19 | X    | 252   | Scan   | 0                               | (0/1)                         | n.s.                                |
| Ortega-Garcia et al., 2015 | Murcia, Spain                   | 1998-2013 | 2       | Areas      | s: census tracts t: months                                                                  | Lymphoma                    | 0-14 | X    | 17    | Scan   | 1                               | (1/1)                         | Lymph, 0-14y, 2 tracts, 07/11-06/13 |

Table S2 continued

| Author, Year       | Study Area  | Period    | Quality | Resolution | Critical lags                                     | Type of cancer | Age  | Time | Cases | Method | Results                         |                               |         |
|--------------------|-------------|-----------|---------|------------|---------------------------------------------------|----------------|------|------|-------|--------|---------------------------------|-------------------------------|---------|
|                    |             |           |         |            |                                                   |                |      |      |       |        | Rate of sig. Tests <sup>a</sup> | Significant test <sup>b</sup> |         |
| Kreis et al., 2016 | Switzerland | 1985-2010 | 4       | Geocodes   | s: 0.5, 1, 2, 5, 10 km<br>t: 6, 12, 18, 24 months | Lymphoma       | 0-15 | B    | 353   | Knox   | 0                               | (0/1)                         | B: n.s. |
|                    |             |           |         |            |                                                   | Lymphoma       | 0-15 | X    | 635   | Knox   | 0                               | (0/1)                         | X: n.s. |

<sup>a</sup>Proportion of significant space-time clustering tests per analysis group (number of clustering tests significant at 5% alpha-level/total number of clustering tests performed).

<sup>b</sup>Characteristics of (most) significant space-time clustering test, specifying (if applicable): time frame of birth B: or diagnosis X: clustering test: diagnostic group, age range, spatial lag, temporal lag, sub-area, sub-period. Results are not adjusted for multiple testing.

**Critical lags:** *s* spatial lag, *t* temporal lag, *NN* nearest neighbors; **Type of Cancer:** *HL* Hodgkin lymphoma, *NHL* non-Hodgkin lymphoma, *BL* Burkitt lymphoma; **Time:** *B* date of birth, *X* date of diagnosis; **Method:** *E-M-M* Ederer-Myers-Mantel, *K-f* K-functions, *Scan* Kulldorff's Scan Statistic; **Results:** *NA* not available, *n.s.* not significant

<sup>1</sup>Excluded as lymphoma were not analyzed as separate diagnostic group

<sup>10</sup>West Nile, 1961-1965

<sup>2</sup>Excluded as number of tests performed is unclear

<sup>11</sup>West Nile, 1966-1970

<sup>3</sup>E-M-M summed for all states, division and regions

<sup>12</sup>West Nile, 1971-1976

<sup>4</sup>Separate analysis of children under 16 years

<sup>13</sup>Summary statistic for whole period used

<sup>5</sup>1961-1965; study group identical with Pike et al. 1967

<sup>14</sup>All diagnostic groups (not only lymphomas)

<sup>6</sup>1966-1970

<sup>15</sup>Inside central Britain

<sup>7</sup>1971-1975

<sup>16</sup>Outside central Britain

<sup>8</sup>North Mara, 1964-1970

<sup>17</sup>1984-1988, Bonferroni corrected

<sup>9</sup>North Mara, 1971-1977

<sup>18</sup>1989-1993, Bonferroni corrected
