# Supplementary material for: Space–time clustering of childhood cancers: a systematic review and pooled analysis
Source: Springer Nature journal article supplement (doi:10.1007/s10654-018-0456-y), 2018-11-16
Supplement: MOESM5 [file 16275942]

**Table S3** Space-time clustering studies of childhood CNS tumours

| Author, Year           | Study area                                                  | Period    | Quality | Resolution | Critical lags                                                                             | Cancer type                                 | Age  | Time | Cases             | Method        | Results                         |                               |                                                                                                                                                |
|------------------------|-------------------------------------------------------------|-----------|---------|------------|-------------------------------------------------------------------------------------------|---------------------------------------------|------|------|-------------------|---------------|---------------------------------|-------------------------------|------------------------------------------------------------------------------------------------------------------------------------------------|
|                        |                                                             |           |         |            |                                                                                           |                                             |      |      |                   |               | Rate of sig. Tests <sup>a</sup> | Significant test <sup>b</sup> |                                                                                                                                                |
| Pinkel et al., 1963    | Buffalo Area, NY, USA                                       | 1943-1956 | 2       | Postcodes  | s: 1/8, 2/8, ..., 1 mile<br>t: not specified                                              | Brain and spinal cord tumors                | 0-15 | X    | NA                | Average ridit | NA                              | (NA/NA) <sup>1</sup>          |                                                                                                                                                |
| Glass et al., 1968     | Los Angeles County, USA                                     | 1960-1964 | 1       | Geocodes   | s: same census region<br>t: 1 year                                                        | Brain tumors                                | 0-14 | X    | NA                | E-M-M         | NA                              | (NA/NA) <sup>1</sup>          |                                                                                                                                                |
| Morris, 1990           | Worcestershire, Warwickshire, Staffordshire, Shropshire; UK | 1953-1960 | 2       | Geocodes   | s: not specified<br>t: not specified                                                      | Cerebral tumours                            | 0-9  | X    | 99                | Knox          | NA                              | (NA/NA) <sup>1</sup>          |                                                                                                                                                |
| Schneider et al., 1993 | New Jersey, USA                                             | 1979-1985 | 2       | Areas      | s: same minor civil division (town)<br>t: 7, 14 months                                    | Brain/CNS                                   | 0-14 | X    | 5500 <sup>2</sup> | E-M-M         | 0                               | (0/2) n.s.                    |                                                                                                                                                |
| Hjalmar et al., 1999   | Sweden                                                      | 1973-1992 | 3       | Areas      | s: Knox: 0, 2, 5, 10, 20, 50, 100 km; K: 10% of population<br>t: 0, 3, 6, 12, 24 months   | Astrocytoma                                 | 0-15 | X    | 628               | Knox          | 0                               | (0/1) <sup>3</sup>            | n.s.                                                                                                                                           |
|                        |                                                             |           |         |            |                                                                                           | Astrocytoma, Medulloblastoma and Ependymoma | 0-15 | X    | 938               | Knox          | 0                               | (0/1) <sup>3</sup>            |                                                                                                                                                |
|                        |                                                             |           |         |            |                                                                                           | Astrocytoma                                 | 0-15 | X    | 628               | Scan          | 0                               | (0/1)                         |                                                                                                                                                |
|                        |                                                             |           |         |            |                                                                                           | Astrocytoma, Medulloblastoma and Ependymoma | 0-15 | X    | 938               | Scan          | 0                               | (0/1)                         |                                                                                                                                                |
| McNally et al., 2002   | North West England, UK                                      | 1954-1998 | 3       | Postcodes  | s: Knox: 5 km, NN=b31/x30; K-f: 0.5-7.5 km, NN=23-37<br>t: Knox: 1 year; K-f: 1-15 months | CNS                                         | 0-14 | B    | 1045              | K-f           | NA                              | (NA/NA)                       | B: significant but no results specified<br>X: Knox: CNS, 0-14y, NN; Astro, 0-14y; Astro, 5-14y, 5km, 1y; K-f: CNS, 0-14y, NN; Astro, 0-14y, NN |
|                        |                                                             |           |         |            |                                                                                           | CNS                                         | 0-14 | X    | 1045              | K-f           | 0.5                             | (1/2)                         |                                                                                                                                                |
|                        |                                                             |           |         |            |                                                                                           | CNS                                         | 0-14 | X    | 1045              | Knox          | 0.5                             | (1/2)                         |                                                                                                                                                |
|                        |                                                             |           |         |            |                                                                                           | Astrocytoma                                 | 0-14 | X    | 422               | K-f           | 0.5                             | (1/2)                         |                                                                                                                                                |
|                        |                                                             |           |         |            |                                                                                           | Astrocytoma                                 | 0-14 | X    | 422               | Knox          | 1                               | (2/2)                         |                                                                                                                                                |
|                        |                                                             |           |         |            |                                                                                           | Astrocytoma                                 | 0-4  | X    | 118               | K-f           | 0                               | (0/2)                         |                                                                                                                                                |
|                        |                                                             |           |         |            |                                                                                           | Astrocytoma                                 | 0-4  | X    | 118               | Knox          | 0                               | (0/2)                         |                                                                                                                                                |
|                        |                                                             |           |         |            |                                                                                           | Astrocytoma                                 | 5-14 | X    | 304               | K-f           | 0                               | (0/2)                         |                                                                                                                                                |
|                        |                                                             |           |         |            |                                                                                           | Astrocytoma                                 | 5-14 | X    | 304               | Knox          | 0.5                             | (1/2)                         |                                                                                                                                                |
|                        |                                                             |           |         |            |                                                                                           | Ependymoma                                  | 0-14 | X    | 109               | K-f           | 0                               | (0/2)                         |                                                                                                                                                |
|                        |                                                             |           |         |            |                                                                                           | Ependymoma                                  | 0-14 | X    | 109               | Knox          | 0                               | (0/2)                         |                                                                                                                                                |
|                        |                                                             |           |         |            |                                                                                           | Medulloblastoma; PNET                       | 0-14 | X    | 200               | K-f           | 0                               | (0/2)                         |                                                                                                                                                |
|                        |                                                             |           |         |            |                                                                                           | Medulloblastoma; PNET                       | 0-14 | X    | 200               | Knox          | 0                               | (0/2)                         |                                                                                                                                                |

Table S3 continued

| Author, Year               | Study area                      | Period    | Quality | Resolution | Critical lags                                                                                              | Cancer type     | Age  | Time | Cases | Method | Results                         |                               |                                                                                                                                                    |
|----------------------------|---------------------------------|-----------|---------|------------|------------------------------------------------------------------------------------------------------------|-----------------|------|------|-------|--------|---------------------------------|-------------------------------|----------------------------------------------------------------------------------------------------------------------------------------------------|
|                            |                                 |           |         |            |                                                                                                            |                 |      |      |       |        | Rate of sig. Tests <sup>a</sup> | Significant test <sup>b</sup> |                                                                                                                                                    |
| Houben et al., 2005        | North Brabant, Netherlands      | 1983-2001 | 3       | Postcodes  | s: Knox: 5 km, NN=30; K-f: 0.5-7.5 km, NN=23-37<br>t: Knox: 1 year; K-f: 0.1-1.5 years                     | Glioma          | 0-14 | X    | 56    | Knox   | 0                               | (0/2) <sup>4</sup>            | n.s.                                                                                                                                               |
|                            |                                 |           |         |            |                                                                                                            | Glioma          | 0-14 | X    | 45    | Knox   | 0                               | (0/2) <sup>5</sup>            |                                                                                                                                                    |
|                            |                                 |           |         |            |                                                                                                            | Glioma          | 0-14 | X    | 56    | K-f    | 0                               | (0/2) <sup>6</sup>            |                                                                                                                                                    |
|                            |                                 |           |         |            |                                                                                                            | Glioma          | 0-14 | X    | 45    | K-f    | 0                               | (0/2) <sup>7</sup>            |                                                                                                                                                    |
| McNally et al., 2006       | Great Britain                   | 1969-1993 | 3       | Postcodes  | s: K-f: NN=19-33, Knox: not specified<br>t: K-f: 0.1, 0.2, ..., 1.5 years; Knox: not specified             | CNS             | 0-14 | X    | 7469  | K-f    | 0                               | (0/1)                         | n.s.                                                                                                                                               |
|                            |                                 |           |         |            |                                                                                                            | Astrocytoma     | 0-14 | X    | 2824  | K-f    | 0                               | (0/1)                         |                                                                                                                                                    |
|                            |                                 |           |         |            |                                                                                                            | PNET            | 0-14 | X    | 1548  | K-f    | 0                               | (0/1)                         |                                                                                                                                                    |
| COMARE, 2006               | England, Scotland and Wales, UK | 1969-1993 | 3       | Postcodes  | s: 0.5, 1, 1.5, ..., 7.5 km<br>t: 0.1, 0.2, ..., 1.5 years                                                 | CNS             | 0-14 | X    | 7473  | K-f    | 0                               | (0/1)                         | n.s.                                                                                                                                               |
|                            |                                 |           |         |            |                                                                                                            | Astrocytoma     | 0-14 | X    | 2826  | K-f    | 0                               | (0/1)                         |                                                                                                                                                    |
| Kearney, 2008              | Florida, USA                    | 1990-1999 | 3       | Areas      | s: Census Tracts<br>t: 1-10 years                                                                          | Brain/CNS       | 0-19 | X    | 1884  | Scan   | 1                               | (1/1)                         | Brain/CNS, 0-19y                                                                                                                                   |
| McNally et al., 2009       | Great Britain                   | 1969-1993 | 3       | Postcodes  | s: K-f: NN=18-32, Knox: NN=25<br>t: K-f: 0.1, 0.2, ..., 1.5 years; Knox: 1 year                            | CNS             | 0-14 | B    | 6863  | K-f    | 1                               | (1/1)                         | CNS, 0-14y                                                                                                                                         |
|                            |                                 |           |         |            |                                                                                                            | Astrocytoma     | 0-14 | B    | 2614  | K-f    | 0                               | (0/1)                         |                                                                                                                                                    |
|                            |                                 |           |         |            |                                                                                                            | PNET            | 0-14 | B    | 1410  | K-f    | 0                               | (0/1)                         |                                                                                                                                                    |
| Amin et al., 2010          | Florida, USA                    | 2000-2007 | 3       | Areas      | s: not specified<br>t: individual years (not specified)                                                    | CNS/Brain tumor | 0-19 | X    | 4591  | Scan   | 1                               | (1/1)                         | CNS, 0-19y, 06-07                                                                                                                                  |
| Ortega-Garcia et al., 2011 | Murcia, Spain                   | 1998-2009 | 2       | Areas      | s: BHA<br>t: months (exact unit unclear)                                                                   | CNS             | 0-14 | X    | 91    | Scan   | 0                               | (0/1)                         | Astrocytoma, 0-14y, 28 BHA, 10/02-02/05                                                                                                            |
|                            |                                 |           |         |            |                                                                                                            | Astrocytoma     | 0-14 | X    | 49    | Scan   | 1                               | (1/1)                         |                                                                                                                                                    |
|                            |                                 |           |         |            |                                                                                                            | Medulloblastoma | 0-14 | X    | 20    | Scan   | 0                               | (0/1)                         |                                                                                                                                                    |
| McNally et al., 2012       | Yorkshire, UK                   | 1974-2006 | 3       | Postcodes  | s: Knox/K-f: 0.5-7.5 km, K-f: NN=b1-15/x5-19; K: 10% of area<br>t: Knox/K-f: 0.1-1.5 years; K: 10% of time | CNS             | 0-14 | B    | 506   | K-f    | 0                               | (0/2)                         | B: K: CNS, 0-14y, 1982<br>X: K-f: PNET, 0-14y; PNET, 0-14y, NN, 74-90; PNET, 0-14y, NN, 91-06; Knox: PNET, 0-14y, 0.5km, 0.9y; K: CNS, 0-14y, 1975 |
|                            |                                 |           |         |            |                                                                                                            | CNS             | 0-14 | X    | 693   | K-f    | 0                               | (0/2)                         |                                                                                                                                                    |
|                            |                                 |           |         |            |                                                                                                            | Ependymoma      | 0-14 | B    | 46    | K-f    | 0                               | (0/2)                         |                                                                                                                                                    |
|                            |                                 |           |         |            |                                                                                                            | Ependymoma      | 0-14 | X    | 59    | K-f    | 0                               | (0/2)                         |                                                                                                                                                    |
|                            |                                 |           |         |            |                                                                                                            | Astrocytoma     | 0-14 | B    | 214   | K-f    | 0                               | (0/2)                         |                                                                                                                                                    |
|                            |                                 |           |         |            |                                                                                                            | Astrocytoma     | 0-14 | X    | 293   | K-f    | 0                               | (0/2)                         |                                                                                                                                                    |
|                            |                                 |           |         |            |                                                                                                            | PNET            | 0-14 | B    | 120   | K-f    | 0                               | (0/2)                         |                                                                                                                                                    |
|                            |                                 |           |         |            |                                                                                                            | PNET            | 0-14 | X    | 165   | K-f    | 1                               | (2/2)                         |                                                                                                                                                    |
|                            |                                 |           |         |            |                                                                                                            | PNET            | 0-14 | X    | 165   | Knox   | 0.147                           | (33/225)                      |                                                                                                                                                    |
|                            |                                 |           |         |            |                                                                                                            | Other gliomas   | 0-14 | B    | 58    | K-f    | 0                               | (0/2)                         |                                                                                                                                                    |
|                            |                                 |           |         |            |                                                                                                            | Other gliomas   | 0-14 | X    | 79    | K-f    | 0                               | (0/2)                         |                                                                                                                                                    |
|                            |                                 |           |         |            |                                                                                                            | CNS             | 0-14 | B    | 506   | Scan   | 1                               | (1/1)                         |                                                                                                                                                    |
|                            |                                 |           |         |            |                                                                                                            | CNS             | 0-14 | X    | 693   | Scan   | 1                               | (1/1)                         |                                                                                                                                                    |
|                            |                                 |           |         |            |                                                                                                            | Ependymoma      | 0-14 | B    | 46    | Scan   | 0                               | (0/1)                         |                                                                                                                                                    |
|                            |                                 |           |         |            |                                                                                                            | Ependymoma      | 0-14 | X    | 59    | Scan   | 0                               | (0/1)                         |                                                                                                                                                    |
|                            |                                 |           |         |            |                                                                                                            | Astrocytoma     | 0-14 | B    | 214   | Scan   | 0                               | (0/1)                         |                                                                                                                                                    |

Table S3 continued

| Author, Year               | Study area    | Period    | Quality | Resolution | Critical lags                                     | Cancer type   | Age  | Time | Cases | Method | Results                         |                               |
|----------------------------|---------------|-----------|---------|------------|---------------------------------------------------|---------------|------|------|-------|--------|---------------------------------|-------------------------------|
|                            |               |           |         |            |                                                   |               |      |      |       |        | Rate of sig. Tests <sup>a</sup> | Significant test <sup>b</sup> |
|                            |               |           |         |            |                                                   | Astrocytoma   | 0-14 | X    | 293   | Scan   | 0                               | (0/1)                         |
|                            |               |           |         |            |                                                   | PNET          | 0-14 | B    | 120   | Scan   | 0                               | (0/1)                         |
|                            |               |           |         |            |                                                   | PNET          | 0-14 | X    | 165   | Scan   | 0                               | (0/1)                         |
|                            |               |           |         |            |                                                   | Other gliomas | 0-14 | B    | 58    | Scan   | 0                               | (0/1)                         |
|                            |               |           |         |            |                                                   | Other gliomas | 0-14 | X    | 79    | Scan   | 0                               | (0/1)                         |
| Ortega-Garcia et al., 2015 | Murcia, Spain | 1998-2013 | 2       | Areas      | s: census tracts<br>t: months                     | CNS           | 0-14 | X    | 38    | Scan   | 0                               | (0/1) n.s.                    |
| Kreis et al., 2016         | Switzerland   | 1985-2010 | 4       | Geocodes   | s: 0.5, 1, 2, 5, 10 km<br>t: 6, 12, 18, 24 months | CNS           | 0-15 | B    | 689   | Knox   | 0                               | (0/1) B: n.s.                 |
|                            |               |           |         |            |                                                   | CNS           | 0-15 | X    | 996   | Knox   | 0                               | (0/1) X: n.s.                 |

<sup>a</sup>Proportion of significant space-time clustering tests per analysis group (number of clustering tests significant at 5% alpha-level/total number of clustering tests performed).

<sup>b</sup>Characteristics of (most) significant space-time clustering test, specifying (if applicable): time frame of birth B: or diagnosis X: clustering test: diagnostic group, age range, spatial lag, temporal lag, sub-area, sub-period. Results are not adjusted for multiple testing.

**Critical lags:** *s* spatial lag, *t* temporal lag, *NN* nearest neighbors, *M* Mantel test, *K-f* K-functions, *K* Kulldorff's scan statistic, *BHA* Basic Health Area; **Cancer type:** *CNS* central nervous system tumour, *PNET* primitive neuroectodermal tumours, *Astro* Astrocytoma; **Time:** *B* date of birth, *X* date of diagnosis; **Method:** *E-M-M* Ederer-Myers-Mantel, *K-f* K-functions, *Scan* Kulldorff's scan statistic; **Results:** *NA* not applicable, *n.s.* not significant, *M* Mantel test, *K-f* K-functions, *K* Kulldorff's scan statistic, *m* mile(s), *d* days, *mth(s)* month(s), *y* year(s).

<sup>1</sup>Excluded as CNS tumours were not analyzed as separate diagnostic group

<sup>3</sup>Knox adjusted for population shifts; combined p-value

<sup>2</sup>All diagnostic groups (not only CNS tumours)

<sup>4</sup>East, 1983-2001; <sup>5</sup>West, 1989-2001; <sup>6</sup>East, 1983-2001; <sup>7</sup>West, 1989-2001
