# Supplementary material for: Space–time clustering of childhood cancers: a systematic review and pooled analysis
Source: Springer Nature journal article supplement (doi:10.1007/s10654-018-0456-y), 2018-11-16
Supplement: MOESM6 [file 16275942]

**Table S4** Space-time clustering studies of other solid tumours

| Author, Year           | Study area                                                  | Period    | Quality | Resolution | Critical lags                                                            | Cancer type                             | Age  | Time | Cases             | Method        | Results                         |                               |                                                                  |
|------------------------|-------------------------------------------------------------|-----------|---------|------------|--------------------------------------------------------------------------|-----------------------------------------|------|------|-------------------|---------------|---------------------------------|-------------------------------|------------------------------------------------------------------|
|                        |                                                             |           |         |            |                                                                          |                                         |      |      |                   |               | Rate of sig. Tests <sup>a</sup> | Significant test <sup>b</sup> |                                                                  |
| Pinkel et al., 1963    | Buffalo Area, NY, USA                                       | 1943-1956 | 2       | Postcodes  | s: 1/8, 2/8, ..., 1 mile<br>t: not specified                             | Neuroblastoma;<br>Wilms tumor; STS      | 0-15 | X    | NA                | Average ridit | NA                              | (NA/NA) <sup>1</sup>          |                                                                  |
| Glass et al., 1968     | Los Angeles County, USA                                     | 1960-1964 | 1       | Geocodes   | s: same census region<br>t: 1 year                                       | Wilms tumor;<br>Neuroblastoma;<br>other | 0-14 | X    | NA                | E-M-M         | NA                              | (NA/NA) <sup>1</sup>          |                                                                  |
| Miller et al., 1968    | United States of America                                    | 1960-1964 | 0       | Areas      | s: same state; same standard division<br>t: 1 year                       | Neuroblastoma                           | 0-14 | X    | 1362              | E-M-M         | 0                               | (0/1) <sup>2</sup>            | Neuroblastoma, 0-14y, 3 standard divisions;<br>Neuroblastoma, 0- |
|                        |                                                             |           |         |            |                                                                          | Neuroblastoma                           | 0-14 | X    | 1362              | E-M-M         | 1                               | (1/1) <sup>3</sup>            |                                                                  |
| Li et al., 1969        | United States of America                                    | 1960-1964 | 0       | Areas      | s: same division<br>t: 1 year                                            | Rhabdomyosarcoma                        | 0-14 | X    | 418               | E-M-M         | 0                               | (0/1) <sup>3</sup>            | n.s.                                                             |
| Glass et al., 1970     | United States of America                                    | 1960-1966 | 0       | Areas      | s: same division<br>t: 1 year                                            | Osteogenic sarcoma                      | 0-14 | X    | 620               | E-M-M         | 0.111                           | (1/9)                         | Osteogenic, 0-14y, West north Central;<br>Ewing, 0-14y, Pacific  |
|                        |                                                             |           |         |            |                                                                          | Ewings sarcoma                          | 0-14 | X    | 381               | E-M-M         | 0.111                           | (1/9)                         |                                                                  |
| Jensen et al., 1971    | United States of America                                    | 1960-1967 | 0       | Areas      | s: same geographic division<br>t: 1 year                                 | Retinoblastoma                          | 0-14 | X    | 269               | E-M-M         | 0                               | (0/9)                         | n.s.                                                             |
| Morris, 1990           | Worcestershire, Warwickshire, Staffordshire, Shropshire; UK | 1953-1960 | 2       | Geocodes   | s: not specified<br>t: not specified                                     | Nephroblastoma;<br>Neuroblastoma        | 0-9  | X    | 91                | Knox          | NA                              | (NA/NA) <sup>1</sup>          |                                                                  |
| Schneider et al., 1993 | New Jersey, USA                                             | 1979-1985 | 2       | Areas      | s: same minor civil division (town)<br>t: 7, 14 months                   | Bone/soft tissue                        | 0-14 | X    | 5500 <sup>4</sup> | E-M-M         | 0                               | (0/2)                         | n.s.                                                             |
| Gilman et al., 1995    | England, Wales and Scotland, UK                             | 1953-1980 | 3       | Postcodes  | s: 1, 2, 3, 4, 5, 10, 20 km<br>t: 0, 1, ..., 6, 9, 12, 18, 24, 48 months | Solid tumours                           | 0-15 | X    | NA                | Knox          | NA                              | (NA/NA) <sup>1</sup>          |                                                                  |

Table S4 continued

| Author, Year         | Study area             | Period    | Quality | Resolution | Critical lags                                                                                 | Cancer type      | Age      | Time | Cases | Method | Results                         |                               |                                                                                                                                                      |
|----------------------|------------------------|-----------|---------|------------|-----------------------------------------------------------------------------------------------|------------------|----------|------|-------|--------|---------------------------------|-------------------------------|------------------------------------------------------------------------------------------------------------------------------------------------------|
|                      |                        |           |         |            |                                                                                               |                  |          |      |       |        | Rate of sig. Tests <sup>a</sup> | Significant test <sup>b</sup> |                                                                                                                                                      |
| McNally et al., 2003 | North West England, UK | 1954-1998 | 3       | Postcodes  | s: Knox: 5 km, NN=b134/x136; K-f: 0.5-7.5 km, NN=127-141<br>t: Knox: 1 year; K-f: 1-15 months | Retinoblastoma   | 0-14     | B    | 128   | K-f    | 0                               | (0/2)                         | B: K-f: Wilms, 0-14y, NN; Wilms, >33 mths; Sarcomas, 0-14y; Rhabdomyosarcoma, 0-14y; Knox: Wilms, 0-14y; Wilms, >33 mths; Sarcomas, 0-14y<br>X: n.s. |
|                      |                        |           |         |            |                                                                                               | Retinoblastoma   | 0-14     | B    | 128   | Knox   | 0                               | (0/2)                         |                                                                                                                                                      |
|                      |                        |           |         |            |                                                                                               | Neuroblastoma    | 0-14     | B    | 287   | K-f    | 0                               | (0/2)                         |                                                                                                                                                      |
|                      |                        |           |         |            |                                                                                               | Neuroblastoma    | 0-14     | B    | 287   | Knox   | 0                               | (0/2)                         |                                                                                                                                                      |
|                      |                        |           |         |            |                                                                                               | PNET             | 0-14     | B    | 92    | K-f    | 0                               | (0/2)                         |                                                                                                                                                      |
|                      |                        |           |         |            |                                                                                               | PNET             | 0-14     | B    | 92    | Knox   | 0                               | (0/2)                         |                                                                                                                                                      |
|                      |                        |           |         |            |                                                                                               | Wilms            | 0-14     | B    | 229   | K-f    | 0.5                             | (1/2)                         |                                                                                                                                                      |
|                      |                        |           |         |            |                                                                                               | Wilms            | 0-14     | B    | 229   | Knox   | 1                               | (2/2)                         |                                                                                                                                                      |
|                      |                        |           |         |            |                                                                                               | Wilms            | <33 mths | B    | NA    | K-f    | 0                               | (0/2)                         |                                                                                                                                                      |
|                      |                        |           |         |            |                                                                                               | Wilms            | <33 mths | B    | NA    | Knox   | 0                               | (0/2)                         |                                                                                                                                                      |
|                      |                        |           |         |            |                                                                                               | Wilms            | >33 mths | B    | NA    | K-f    | 1                               | (2/2)                         |                                                                                                                                                      |
|                      |                        |           |         |            |                                                                                               | Wilms            | >33 mths | B    | NA    | Knox   | 1                               | (2/2)                         |                                                                                                                                                      |
|                      |                        |           |         |            |                                                                                               | Hepatic          | 0-14     | B    | 33    | K-f    | 0                               | (0/2)                         |                                                                                                                                                      |
|                      |                        |           |         |            |                                                                                               | Hepatic          | 0-14     | B    | 33    | Knox   | 0                               | (0/2)                         |                                                                                                                                                      |
|                      |                        |           |         |            |                                                                                               | Sarcomas         | 0-14     | B    | 370   | K-f    | 1                               | (2/2)                         |                                                                                                                                                      |
|                      |                        |           |         |            |                                                                                               | Sarcomas         | 0-14     | B    | 370   | Knox   | 1                               | (2/2)                         |                                                                                                                                                      |
|                      |                        |           |         |            |                                                                                               | Osteosarcoma     | 0-14     | B    | 105   | K-f    | 0                               | (0/2)                         |                                                                                                                                                      |
|                      |                        |           |         |            |                                                                                               | Osteosarcoma     | 0-14     | B    | 105   | Knox   | 0                               | (0/2)                         |                                                                                                                                                      |
|                      |                        |           |         |            |                                                                                               | Rhabdomyosarcoma | 0-14     | B    | 159   | K-f    | 1                               | (2/2)                         |                                                                                                                                                      |
|                      |                        |           |         |            |                                                                                               | Rhabdomyosarcoma | 0-14     | B    | 159   | Knox   | 0                               | (0/2)                         |                                                                                                                                                      |
| Germ cell            | 0-14                   | B         | 140     | K-f        | 0                                                                                             | (0/2)            |          |      |       |        |                                 |                               |                                                                                                                                                      |
| Germ cell            | 0-14                   | B         | 140     | Knox       | 0                                                                                             | (0/2)            |          |      |       |        |                                 |                               |                                                                                                                                                      |
| Retinoblastoma       | 0-14                   | X         | 128     | K-f        | 0                                                                                             | (0/2)            |          |      |       |        |                                 |                               |                                                                                                                                                      |

Table S4 continued

| Author, Year         | Study area    | Period    | Quality | Resolution | Critical lags                                                                                     | Cancer type                        | Age  | Time | Cases | Method | Results                         |                               |
|----------------------|---------------|-----------|---------|------------|---------------------------------------------------------------------------------------------------|------------------------------------|------|------|-------|--------|---------------------------------|-------------------------------|
|                      |               |           |         |            |                                                                                                   |                                    |      |      |       |        | Rate of sig. Tests <sup>a</sup> | Significant test <sup>b</sup> |
|                      |               |           |         |            |                                                                                                   | Retinoblastoma                     | 0-14 | X    | 128   | Knox   | 0                               | (0/2)                         |
|                      |               |           |         |            |                                                                                                   | Neuroblastoma                      | 0-14 | X    | 287   | K-f    | 0                               | (0/2)                         |
|                      |               |           |         |            |                                                                                                   | Neuroblastoma                      | 0-14 | X    | 287   | Knox   | 0                               | (0/2)                         |
|                      |               |           |         |            |                                                                                                   | PNET                               | 0-14 | X    | 92    | K-f    | 0                               | (0/2)                         |
|                      |               |           |         |            |                                                                                                   | PNET                               | 0-14 | X    | 92    | Knox   | 0                               | (0/2)                         |
|                      |               |           |         |            |                                                                                                   | Wilms                              | 0-14 | X    | 229   | K-f    | 0                               | (0/2)                         |
|                      |               |           |         |            |                                                                                                   | Wilms                              | 0-14 | X    | 229   | Knox   | 0                               | (0/2)                         |
|                      |               |           |         |            |                                                                                                   | Hepatic                            | 0-14 | X    | 33    | K-f    | 0                               | (0/2)                         |
|                      |               |           |         |            |                                                                                                   | Hepatic                            | 0-14 | X    | 33    | Knox   | 0                               | (0/2)                         |
|                      |               |           |         |            |                                                                                                   | Sarcomas                           | 0-14 | X    | 370   | K-f    | 0                               | (0/2)                         |
|                      |               |           |         |            |                                                                                                   | Sarcomas                           | 0-14 | X    | 370   | Knox   | 0                               | (0/2)                         |
|                      |               |           |         |            |                                                                                                   | Osteosarcoma                       | 0-14 | X    | 105   | K-f    | 0                               | (0/2)                         |
|                      |               |           |         |            |                                                                                                   | Osteosarcoma                       | 0-14 | X    | 105   | Knox   | 0                               | (0/2)                         |
|                      |               |           |         |            |                                                                                                   | Rhabdomyosarcoma                   | 0-14 | X    | 159   | K-f    | 0                               | (0/2)                         |
|                      |               |           |         |            |                                                                                                   | Rhabdomyosarcoma                   | 0-14 | X    | 159   | Knox   | 0                               | (0/2)                         |
|                      |               |           |         |            |                                                                                                   | Germ cell                          | 0-14 | X    | 140   | K-f    | 0                               | (0/2)                         |
|                      |               |           |         |            |                                                                                                   | Germ cell                          | 0-14 | X    | 140   | Knox   | 0                               | (0/2)                         |
| McNally et al., 2006 | Great Britain | 1969-1993 | 3       | Postcodes  | s: K-f: NN=19-33, Knox: not specified<br>t: K-f: 0.1, 0.2, ..., 1.5 years;<br>Knox: not specified | STS                                | 0-14 | X    | 2101  | K-f    | 1                               | (1/1)                         |
|                      |               |           |         |            |                                                                                                   | Bone tumors                        | 0-14 | X    | 1504  | K-f    | 0                               | (0/1)                         |
|                      |               |           |         |            |                                                                                                   | Osteosarcoma                       | 0-14 | X    | 811   | K-f    | 1                               | (1/1)                         |
|                      |               |           |         |            |                                                                                                   | Sympathetic nervous system tumours | 0-14 | X    | 2110  | K-f    | 0                               | (0/1)                         |
|                      |               |           |         |            |                                                                                                   | Wilms and other renal tumours      | 0-14 | X    | 1889  | K-f    | 0                               | (0/1)                         |
|                      |               |           |         |            |                                                                                                   | Germ cell and related tumours      | 0-14 | X    | 983   | K-f    | 0                               | (0/1)                         |
|                      |               |           |         |            |                                                                                                   | Germ cell and related tumours      | 0-14 | X    | 983   | K-f    | 0                               | (0/1)                         |

Table S4 continued

| Author, Year               | Study area                      | Period    | Quality | Resolution | Critical lags                                                                      | Cancer type                        | Age  | Time | Cases | Method | Results                         |                               |                                    |
|----------------------------|---------------------------------|-----------|---------|------------|------------------------------------------------------------------------------------|------------------------------------|------|------|-------|--------|---------------------------------|-------------------------------|------------------------------------|
|                            |                                 |           |         |            |                                                                                    |                                    |      |      |       |        | Rate of sig. Tests <sup>a</sup> | Significant test <sup>b</sup> |                                    |
| COMARE, 2006               | England, Scotland and Wales, UK | 1969-1993 | 3       | Postcodes  | s: 0.5, 1, 1.5, ..., 7.5 km<br>t: 0.1, 0.2, ..., 1.5 years                         | Retinoblastoma,                    | 0-14 | X    | 941   | K-f    | 0                               | (0/1)                         | STS, 0-14y;<br>Osteosarcoma, 0-14y |
|                            |                                 |           |         |            |                                                                                    | Hepatic tumours                    | 0-14 | X    | 257   | K-f    | 0                               | (0/1)                         |                                    |
|                            |                                 |           |         |            |                                                                                    | Carcinoma                          | 0-14 | X    | 877   | K-f    | 0                               | (0/1)                         |                                    |
|                            |                                 |           |         |            |                                                                                    | STS                                | 0-14 | X    | 2101  | K-f    | 1                               | (1/1)                         |                                    |
|                            |                                 |           |         |            |                                                                                    | Bone tumors                        | 0-14 | X    | 1507  | K-f    | 0                               | (0/1)                         |                                    |
|                            |                                 |           |         |            |                                                                                    | Wilms and other renal tumours      | 0-14 | X    | 1890  | K-f    | 0                               | (0/1)                         |                                    |
|                            |                                 |           |         |            |                                                                                    | Osteosarcoma                       | 0-14 | X    | 813   | K-f    | 1                               | (1/1)                         |                                    |
| McNally et al., 2009       | Great Britain                   | 1969-1993 | 3       | Postcodes  | s: K-f: NN=18-32, Knox: NN=25<br>t: K-f: 0.1, 0.2, ..., 1.5 years;<br>Knox: 1 year | STS                                | 0-14 | B    | 1921  | K-f    | 0                               | (0/1)                         | Osteosarcoma, 0-14y                |
|                            |                                 |           |         |            |                                                                                    | Bone tumors                        | 0-14 | B    | 1262  | K-f    | 0                               | (0/1)                         |                                    |
|                            |                                 |           |         |            |                                                                                    | Osteosarcoma                       | 0-14 | B    | 669   | K-f    | 1                               | (1/1)                         |                                    |
|                            |                                 |           |         |            |                                                                                    | Sympathetic nervous system tumours | 0-14 | B    | 2002  | K-f    | 0                               | (0/1)                         |                                    |
|                            |                                 |           |         |            |                                                                                    | Wilms and other renal tumours      | 0-14 | B    | 1820  | K-f    | 0                               | (0/1)                         |                                    |
|                            |                                 |           |         |            |                                                                                    | Germ cell and related tumours      | 0-14 | B    | 915   | K-f    | 0                               | (0/1)                         |                                    |
|                            |                                 |           |         |            |                                                                                    | Retinoblastoma,                    | 0-14 | B    | 911   | K-f    | 0                               | (0/1)                         |                                    |
|                            |                                 |           |         |            |                                                                                    | Hepatic tumours                    | 0-14 | B    | 245   | K-f    | 0                               | (0/1)                         |                                    |
|                            |                                 |           |         |            |                                                                                    | Carcinoma                          | 0-14 | B    | 789   | K-f    | 0                               | (0/1)                         |                                    |
|                            |                                 |           |         |            |                                                                                    | other                              | 0-19 | X    | 4591  | Scan   | NA                              | (NA/NA) <sup>1</sup>          |                                    |
| Amin et al., 2010          | Florida, USA                    | 2000-2007 | 3       | Areas      | s: not specified<br>t: individual years (not specified)                            |                                    |      |      |       |        |                                 |                               |                                    |
| Ortega-Garcia et al., 2011 | Murcia, Spain                   | 1998-2009 | 2       | Areas      | s: BHA<br>t: months (exact unit unclear)                                           | SNS                                | 0-14 | X    | 29    | Scan   | 1                               | (1/1)                         | SNS, 0-14y, 3 BHA,<br>07/01-01/07  |
|                            |                                 |           |         |            |                                                                                    | Retinoblastoma                     | 0-14 | X    | 5     | Scan   | 0                               | (0/1)                         |                                    |
| Ortega-Garcia et al., 2015 | Murcia, Spain                   | 1998-2013 | 2       | Areas      | s: census tracts<br>t: months                                                      | SNS                                | 0-14 | X    | 17    | Scan   | 0                               | (0/1)                         | n.s.                               |

**Table S4** continued

| Author, Year       | Study area  | Period    | Quality | Resolution | Critical lags                                     | Cancer type    | Age  | Time | Cases | Method | Results                         |                               |                                                                    |
|--------------------|-------------|-----------|---------|------------|---------------------------------------------------|----------------|------|------|-------|--------|---------------------------------|-------------------------------|--------------------------------------------------------------------|
|                    |             |           |         |            |                                                   |                |      |      |       |        | Rate of sig. Tests <sup>a</sup> | Significant test <sup>b</sup> |                                                                    |
| Kreis et al., 2016 | Switzerland | 1985-2010 | 4       | Geocodes   | s: 0.5, 1, 2, 5, 10 km<br>t: 6, 12, 18, 24 months | Neuroblastomas | 0-15 | B    | 268   | Knox   | 0                               | (0/1)                         | B: Neuroblastomas, 0-15y, 10km, 2y; STS, 0-15y, 5km, 2y<br>X: n.s. |
|                    |             |           |         |            |                                                   | Neuroblastomas | 0-15 | X    | 310   | Knox   | 0                               | (0/1)                         |                                                                    |
|                    |             |           |         |            |                                                   | STS            | 0-15 | B    | 229   | Knox   | 0                               | (0/1)                         |                                                                    |
|                    |             |           |         |            |                                                   | STS            | 0-15 | X    | 334   | Knox   | 0                               | (0/1)                         |                                                                    |

<sup>a</sup>Proportion of significant space-time clustering tests per analysis group (number of clustering tests significant at 5% alpha-level/total number of clustering tests performed).

<sup>b</sup>Characteristics of (most) significant space-time clustering test, specifying (if applicable): time frame of birth B or diagnosis X; clustering test: diagnostic group, age range, spatial lag, temporal lag, sub-area and sub-period. Reported results are unadjusted for multiple testing.

**Critical lags:** *s* spatial lag, *t* temporal lag, *NN* nearest neighbors, *M* Mantel test, *K-f* K-functions, *K* Kulldorff's scan statistic, *BHA* Basic Health Area; **Cancer type:** *PNET* peripheral neuroectodermal tumours, *SNS* sympathetic nervous system tumour, *STS* soft tissue sarcomas; **Time:** *B* date of birth, *X* date of diagnosis; **Method:** *E-M-M* Ederer-Myers-Mantel, *K-f* K-functions, *Scan* Kulldorff's scan statistic; **Results:** *NA* not applicable, *n.s.* not significant, *M* Mantel test, *K-f* K-functions, *K* Kulldorff's scan statistic, *m* mile(s), *d* days, *mth(s)* month(s), *y* year(s).

<sup>1</sup>Excluded as other tumours were not analyzed as separate diagnostic group

<sup>3</sup>Summation across divisions

<sup>2</sup>Summation across states

<sup>4</sup>All diagnostic groups
