# Supplementary material for: Space–time clustering of childhood cancers: a systematic review and pooled analysis
Source: Springer Nature journal article supplement (doi:10.1007/s10654-018-0456-y), 2018-11-16
Supplement: MOESM7 [file 16275942]

**Table S5** Quality criteria of space-time clustering studies

| Author, Year           | Source of case ascertainment                                                    | Spatial resolution                       | Multiple Testing | Population Shifts            | Score |
|------------------------|---------------------------------------------------------------------------------|------------------------------------------|------------------|------------------------------|-------|
| Pinkel et al., 1959    | Cancer registry of Erie County and New York State Health Departments            | Street address                           |                  |                              | 2     |
| Pinkel et al., 1963    | Cancer registry of the State of New York; local hospital records                | Street address                           |                  |                              | 2     |
| Ederer et al., 1964    | Tumor Registry, Connecticut State Department of Health                          | 169 towns                                |                  |                              | 1     |
| Knox, 1964             | Regional Cancer Registration Bureau; hospital records; death certificates       | National grid (0.5km)                    |                  |                              | 1     |
| Meighan et al., 1965   | Death certificates <sup>1</sup>                                                 | Geocodes (0.1km)                         |                  |                              | 1     |
| Ederer et al., 1965    | Connecticut Tumor Registry                                                      | 169 town units                           |                  | 5-year study periods         | 2     |
| Fraumeni et al., 1966  | Bureau of Cancer Control, New York State Health Department; death certificates  | 417 cities and towns                     |                  |                              | 1     |
| Mainwaring, 1966       | Alder Hey and Royal Liverpool Children's Hospitals                              | Geocodes (0.1km); 40 electoral wards     |                  |                              | 1     |
| Pike et al., 1967      | Angal Mission, Arua Government and Kuluva Mission Hospitals                     | Geocodes                                 |                  |                              | 1     |
| Stark et al., 1967     | Death certificates from the Michigan State Department of Health                 | State; 83 counties                       |                  |                              | 0     |
| Till et al., 1967      | Oxford Survey of Childhood Malignancies; Hospital records; Death certificates   | Geocodes (0.1km)                         |                  |                              | 2     |
| Gunz et al., 1968      | New Zealand Department of Health Cancer Death Lists                             | Postcodes (1 mile)                       |                  |                              | 1     |
| Browning et al., 1968  | 23 hospitals; Department of Vital Statistics Ohio                               | not specified; 34 municipalities         |                  |                              | 0     |
| Glass et al., 1968     | Death certificates from the National Center for Health Statistics               | Geocodes (150m); 32 census regions       |                  |                              | 1     |
| Klauber, 1968          | Death and birth certificates; California Tumor Registry; hospital records       | 468 hospitals                            |                  |                              | 1     |
| Miller et al., 1968    | Death certificates from the National Vital Statistics, Public Health Service    | 51 States; 9 standard divisions          |                  |                              | 0     |
| Williams et al., 1969  | Kuluva and Arua Hospital                                                        | Geocodes                                 |                  |                              | 1     |
| Glass et al., 1969     | National Center for Health Statistics                                           | Address (200m)                           |                  |                              | 1     |
| Fraumeni et al., 1969  | Death certificates from the National Vital Statistics, Public Health Service    | 51 states; 9 stand. divisions; 4 regions |                  |                              | 0     |
| Li et al., 1969        | Death certificates from the National Vital Statistics, Public Health Service    | 9 standard divisions                     |                  |                              | 0     |
| Klauber et al., 1970   | San Francisco Department of Public Health; Medical Society; Stanford University | Geocodes                                 |                  | 4 separate 5-year periods    | 2     |
| Bailar et al., 1970    | Hospital records; death certificates                                            | 169 administrative areas (towns)         |                  |                              | 0     |
| Glass et al., 1970     | Death certificates <sup>2</sup>                                                 | 9 geographic divisions                   |                  |                              | 0     |
| Zahálková et al., 1970 | Paediatric University Clinics, district hospitals and paediatricians            | 13 districts                             |                  |                              | 0     |
| Glass et al., 1971     | Cancer Death List; New Zealand Department of Health                             | Geocodes                                 |                  | 2 consecutive 6-year periods | 2     |
| Jensen et al., 1971    | US Public Health Service death certificates                                     | 9 geographic divisions                   |                  |                              | 0     |
| Brubaker et al., 1973  | Shirati Hospital Registry; Kampala Cancer Registry                              | Geocodes                                 |                  |                              | 2     |
| Evatt et al., 1973     | Leukemia registry of metropolitan Atlanta area                                  | 111 census tract units                   |                  | growth curve modelling       | 2     |

**Table S5** continued

| Author, Year                   | Source of case ascertainment                                                                | Spatial resolution                       | Multiple Testing             | Population Shifts                        | Score |
|--------------------------------|---------------------------------------------------------------------------------------------|------------------------------------------|------------------------------|------------------------------------------|-------|
| Larsen et al., 1973            | Ongoing population-based leukemia/lymphoma registry                                         | 18 census tracts                         |                              | n/a <sup>3</sup>                         | 2     |
| Smith et al., 1976             | Oxford Survey of Childhood Malignancies; Hospital records; Death certificates               | Geocodes                                 | not specified                |                                          | 3     |
| Morrow et al., 1976            | Kampala Cancer Registry                                                                     | Geocodes                                 |                              |                                          | 2     |
| Morrow et al., 1977            | Kampala Cancer Registry                                                                     | Geocodes (1km)                           |                              |                                          | 2     |
| Williams et al., 1978          | Hospital records; Lymphoma Treatment Centre Uganda Cancer Institute; Uganda Cancer Registry | Geocodes; 10 administrative districts    |                              |                                          | 2     |
| Biggar et al., 1979            | Burkitt's Tumor Project at Korle Bu Hospital in Accra                                       | Home community                           |                              |                                          | 0     |
| Siemiatycki et al., 1980       | Shirati Hospital Register (North Mara)                                                      | Geocodes                                 |                              |                                          | 1     |
| Van Steensel-Moll et al., 1983 | Morbidity Registry of the Dutch Childhood Leukaemia Study Group                             | <500m (approx.) <sup>4</sup>             |                              |                                          | 1     |
| Pinder, 1985                   | Mersey Regional Cancer Registry                                                             | Postcodes                                |                              |                                          | 2     |
| Mangoud et al., 1985           | North Western Regional Cancer Registry                                                      | Postcodes (100m)                         |                              |                                          | 2     |
| Morris, 1990                   | Oxford Survey of Childhood Cancers; Regional Cancer Registry Birmingham                     | Geocodes (100m)                          |                              |                                          | 2     |
| Gilman et al., 1991            | National Registry of Childhood Tumours                                                      | Postcode; grid reference                 |                              | Klauber and Mustacchi (1970)             | 3     |
| Knox et al., 1992              | National Registry of Childhood Tumours                                                      | Postcodes (100m)                         |                              | moving time window of 1000 days          | 3     |
| Van Den Bosch et al., 1993     | Burkitt's Lymphoma Research Unit at Kamuzu Central Hospital                                 | Geocodes (200m)                          |                              |                                          | 1     |
| Schneider et al., 1993         | New Jersey Cancer Registry                                                                  | 567 Minor Civil Divisions (towns)        |                              | analysis for 3 time periods of 28 months | 2     |
| Gilman et al., 1995            | Oxford Survey of Childhood Cancers                                                          | Postcodes (100m)                         |                              | Klauber and Mustacchi 1970               | 3     |
| Petridou et al., 1996          | Hospital Archives; National Network of Childhood Oncologists                                | Geocodes                                 |                              |                                          | 2     |
| Alexander et al., 1998         | Specialist Cancer Registries                                                                | Small census areas                       |                              |                                          | 1     |
| Gustafsson et al., 1999        | Swedish Cancer Registry; Swedish Medical Birth Register                                     | 277 Municipalities                       | Bonferroni                   |                                          | 2     |
| Gilman et al., 1999            | Leukemia Research Fund Data Collection Survey                                               | Postcodes (100m)                         | Rodrigues et al. 1992        |                                          | 3     |
| Hjalmars et al., 1999          | Swedish Cancer Registry                                                                     | 2507 parishes                            | Baker's Max/ Scan statistics | Kulldorff & Hjalmars 1999                | 3     |
| Gilman et al., 1999            | Leukaemia Research Fund Data Collection Study                                               | Geocodes                                 | Rodrigues et al. 1992        |                                          | 3     |
| Birch et al., 2000             | Manchester Children's Tumour Registry                                                       | Geocodes 1954-73; Postcodes (100m) 74-85 | K-function                   |                                          | 3     |
| Gustafsson et al., 2000        | Swedish Cancer Registry; Swedish Medical Birth Registry                                     | 277 municipalities                       | Bonferroni                   |                                          | 2     |
| McNally et al., 2002           | Manchester Children's Tumour Registry                                                       | Postcodes (100m)                         | K-function                   |                                          | 3     |
| McNally et al., 2002           | Manchester Children's Tumour Registry                                                       | Postcodes (100m)                         | K-function                   |                                          | 3     |
| McNally et al., 2003           | Manchester Children's Tumour Registry                                                       | Postcodes (100m)                         | K-function                   |                                          | 3     |
| McNally et al., 2004           | Manchester Children's Tumour Registry                                                       | Postcodes (100m)                         | K-function                   |                                          | 3     |

**Table S5** continued

| Author, Year               | Source of case ascertainment                                         | Spatial resolution                     | Multiple Testing               | Population Shifts                      | Score |
|----------------------------|----------------------------------------------------------------------|----------------------------------------|--------------------------------|----------------------------------------|-------|
| Houben et al., 2005        | Eindhoven Cancer Registry                                            | Postcodes (nbhds/small municipalities) | K-function                     |                                        | 3     |
| Akhtar et al., 2005        | Two Tertiary Care Hospitals in Karachi                               | Geocodes (1km)                         |                                |                                        | 1     |
| McNally et al., 2006       | National Registry of Childhood Tumours                               | Postcodes (100m)                       | K-function                     |                                        | 3     |
| Bellec et al., 2006        | French National Registry of Childhood Haematopoietic Malignancies    | 3644 Cantons; 36343 Communes           | Scan statistics                | interpolation between 1990/1999 census | 3     |
| COMARE, 2006               | National Registry of Childhood Tumours                               | Postcodes (100m)                       | K-function                     |                                        | 3     |
| Kearney, 2008              | Florida Cancer Data System                                           | 3154 Census Tracts                     | Scan statistics                | linear interpolation                   | 3     |
| McNally et al., 2009       | National Registry of Childhood Tumours                               | Postcodes (100m)                       | K-function                     |                                        | 3     |
| Schmiedel et al., 2010     | German Childhood Cancer Registry                                     | Municipalities; 30x30km squares        | Scan statistics                |                                        | 2     |
| Amin et al., 2010          | Florida Association of Pediatric Tumor Programs                      | 972 Zip code areas                     | Scan statistics                | n/a <sup>5</sup>                       | 3     |
| Ortega-Garcia et al., 2011 | Registry of the Virgen de la Arrixaca Hospital                       | 85 Basic Health Areas                  | Scan statistics                | Directly Standardized Rates            | 2     |
| Demoury et al., 2012       | French National Registry of Childhood Haematopoietic Malignancies    | 1895 Living Zones <sup>6</sup>         | Scan statistics                |                                        | 2     |
| McNally et al., 2012       | Yorkshire Specialist Register of Cancer in Children and Young People | Postcodes (100m)                       | K-function/<br>Scan statistics |                                        | 3     |
| Ortega-Garcia et al., 2015 | Provincial Cancer Registry (MACAPEMUR)                               | 386 Census tracts                      | Scan statistics                |                                        | 2     |
| Kreis et al., 2016         | Swiss Childhood Cancer Registry                                      | Geocodes                               | Baker's Max                    | Kulldorff and Hjalmars 1999            | 4     |

<sup>1</sup>Source unknown

<sup>2</sup>1960-64 all USA; 1965-66 USA excluding Louisiana and Missouri

<sup>3</sup>Effect excluded by comparison with cases aged 15-54

<sup>4</sup>Addresses were located on 1:50,000 scale map and larger scale street maps in larger towns

<sup>5</sup>Analysis of 55 large counties instead of ZIP code areas made little difference

<sup>6</sup>Mean population per Living Zone 30,500 people
