# Supplementary material for: Space–time clustering of childhood cancers: a systematic review and pooled analysis
Source: Springer Nature journal article supplement (doi:10.1007/s10654-018-0456-y), 2018-11-16
Supplement: MOESM8 [file 16275942]

**Table S6** Quantitative synthesis of results of space-time clustering analyses of childhood leukaemia for time of diagnosis and birth: Number of studies individually reporting significant evidence of space-time clustering and mean proportion of significant tests (MPST) for different study data and methodological characteristics\*

| Category                   | Diagnosis                       |                   | Birth                           |                   |
|----------------------------|---------------------------------|-------------------|---------------------------------|-------------------|
|                            | n <sup>a</sup> /No <sup>b</sup> | MPST <sup>c</sup> | n <sup>a</sup> /No <sup>b</sup> | MPST <sup>c</sup> |
| Leukaemia                  | 10/23                           | 26%               | 1/9                             | 11%               |
| Study Period               |                                 |                   |                                 |                   |
| Begins in 1980 or later    | 2/6                             | 15%               | 1/2                             | 50%               |
| Ends in 1990 or later      | 1/6                             | 17%               | 1/4                             | 25%               |
| Study region               |                                 |                   |                                 |                   |
| UK                         | 3/7                             | 28%               | 0/5                             | 0%                |
| USA                        | 4/8                             | 24%               | 0/2                             | 0%                |
| Europe                     | 2/6                             | 22%               | 1/2                             | 50%               |
| Sample size                |                                 |                   |                                 |                   |
| N > 1000                   | 3/8                             | 32%               | 1/3                             | 33%               |
| N < 1000                   | 9/22                            | 17%               | 0/7                             | 0%                |
| Geocoding                  |                                 |                   |                                 |                   |
| Geocodes                   | 5/10                            | 26%               | 1/4                             | 25%               |
| Postcodes                  | 1/6                             | 17%               | 0/2                             | 0%                |
| Areas                      | 4/10                            | 23%               | 0/3                             | 0%                |
| Population shifts adjusted | 3/8                             | 20%               | 1/1                             | 100%              |
| Methods score ≥ 3          | 2/6                             | 30%               | 1/5                             | 20%               |
| Clustering test            |                                 |                   |                                 |                   |
| Knox                       | 7/19                            | 14%               | 1/6                             | 17%               |
| Mantel                     | 1/5                             | 19%               | 0/1                             | 0%                |
| K-functions                | 2/3                             | 67%               | 0/3                             | 0%                |
| Kulldorff                  | 2/5                             | 40%               | 0/0                             |                   |

<sup>a</sup>Number of studies individually reporting significant evidence of clustering (proportion of significant clustering tests > 0.05)

<sup>b</sup>Number of studies included (excluding studies with overlapping samples and five studies employing scan statistics as clustering test listed separately under the Kulldorff category)

<sup>c</sup>Mean proportion of significant clustering tests across included studies

\*Total number of studies might vary by stratified analysis because of differing exclusions due to overlapping study samples (cf. Section “Excluded studies” in the online supplementary material)
